# Supplementary material for: Optical control of mammalian endogenous transcription and epigenetic states
Source: Springer Nature journal article supplement (doi:10.1038/nature12466), 2013-07-23
Supplement: 41586_2013_BFnature12466_MOESM78_ESM.pdf [file 41586_2013_BFnature12466_MOESM78_ESM.pdf]

**SUPPLEMENTARY METHODS****Photostimulation Hardware – *in vitro***

*In vitro* light stimulation experiments were performed using a custom built LED photostimulation device. All electronic elements were mounted on a custom printed circuit board (ExpressPCB). Blue LEDs with peaks 466 nm (model #: YSL-R542B5C-A11, China Young Sun LED Technology; distributed by SparkFun Electronics as ‘LED – Super Bright Blue’ COM-00529), were arrayed in groups of three aligned with the wells of a Corning 24-well plate. LED current flow was regulated by a 25 mA DynaOhm driver (LEDdynamics #4006-025). Columns of the LED array were addressed by TTL control (Fairchild Semiconductor PN2222BU-ND) via an Arduino UNO microcontroller board. Light output was modulated via pulse width modulation. Light output was measured from a distance of 80 mm above the array utilizing a Thorlabs PM100D power meter and S120VC photodiode detector. In order to provide space for ventilation and to maximize light field uniformity, an 80 mm tall ventilation spacer was placed between the LED array and the 24-well sample plate. Fans (Evercool EC5015M12CA) were mounted along one wall of the spacer unit, while the opposite wall was fabricated with gaps to allow for increased airflow.

**Quantification of LIVE/DEAD® assay using ImageJ software.**

Images of LIVE/DEAD (Life Technologies) stained cells were captured by fluorescence microscopy and processed as follows: Background was subtracted (*Process* → *Subtract Background*). A threshold based on fluorescence area was set to ensure accurate identification of cell state (*Image* → *Adjust* → *Threshold*). A segmentation analysis was performed to enable automated counting of individual cells (*Process* → *Binary* → *Watershed*). Finally, debris signals were filtered and cells were counted (*Analyze* → *Analyze Particles*). Toxicity was determined as the percentage of dead cells.

**Chemically-inducible TALEs**

Neuro2A cells were grown in a medium containing a 1:1 ratio of OptiMEM (Life Technologies) to high-glucose DMEM with GlutaMax and Sodium Pyruvate (Life Technologies) supplemented with 5% HyClone heat-inactivated FBS (Thermo Scientific), 1% penicillin/streptomycin (Life

Technologies) and 25mM HEPES (Sigma Aldrich). 150,000 cells were plated in each well of a 24-well plate 18-24 hours prior to transfection. Cells were transfected with 1  $\mu$ g total of construct DNA (at equimolar ratios) per well and 2  $\mu$ L of Lipofectamine 2000 (Life Technologies) according to the manufacturer's recommended protocols. Media was exchanged 12 hours post-transfection. For the kinetics test, chemical induction was started 24 hours post-transfection, when abscisic acid (ABA, Sigma Aldrich) was added to fresh media to a final concentration of 250  $\mu$ M. RNA was extracted using the RNeasy kit (Qiagen) according to manufacturer's instructions and 1  $\mu$ g of RNA per sample was reverse-transcribed using qScript (Quanta Biosystems). Relative mRNA levels were measured by quantitative real-time PCR (qRT-PCR) using Taqman probes specific for the targeted gene as well as mouse GAPDH as an endogenous control (Life Technologies, see Supplementary Table 2 for Taqman probe IDs).  $\Delta\Delta$ Ct analysis was used to obtain fold-changes relative to negative controls where cells were subjected to mock transfection with GFP.

### **Cas9 transcriptional effectors**

HEK 293FT cells were co-transfected with mutant Cas9 fusion protein and a synthetic guide RNA (sgRNA) using Lipofectamine 2000 (Life Technologies) 24 hours after seeding into a 24 well dish. 72 hours post-transfection, total RNA was purified (RNeasy Plus, Qiagen). 1  $\mu$ g of RNA was reverse transcribed into cDNA (qScript, Quanta BioSciences). Quantitative real-time PCR was done according to the manufacturer's protocol (Life Technologies) and performed in triplicate using TaqMan Assays for hKlf4 (Hs00358836\_m1), hSox2 (Hs01053049\_s1), and the endogenous control GAPDH (Hs02758991\_g1).

The hSpCas9 activator plasmid was cloned into a lentiviral vector under the expression of the hEF1a promoter (pLenti-EF1a-Cas9-NLS-VP64). The hSpCas9 repressor plasmid was cloned into the same vector (pLenti-EF1a-SID4x-NLS-Cas9-NLS). Guide sequences (20bp) targeted to the *KLF4* locus are: 5'-GCGCGCTCCACACAACCTCAC, 5'-GCAAAAATAGACAATCAGCA, GAAGGATCTCGGCCAATTTG. Spacer sequences for guide RNAs targeted to the *SOX2* locus are: 5'-GCTGCCGGGTTTTGCATGAA, 5'-CCGGGCCCGCAGCAAACCTTC, 5'-GGGGCTGTCAGGGAATAAAT.

## SUPPLEMENTARY DISCUSSION

### Optogenetic actuators

Microbial and plant-derived light-sensitive proteins have been engineered as optogenetic actuators, allowing optical control of cellular functions including membrane potential<sup>2-4</sup>, intracellular signaling<sup>5</sup>, protein interactions<sup>6-9</sup>, and heterologous gene expression<sup>7,9-13</sup>.

### Ambient light exposure

All cells were cultured at low light levels ( $<0.01$  mW/cm<sup>2</sup>) at all times except during stimulation. These precautions were taken as ambient light in the room (0.1-0.2 mW/cm<sup>2</sup>) was found to significantly activate the LITE system (**Extended Data Fig. 2c**). No special precautions were taken to shield animals from light during *in vivo* experiments – even assuming ideal propagation within the implanted optical fiber, an estimation of light transmission at the fiber terminal due to ambient light was  $<0.01$  mW (based on 200  $\mu$ m fiber core diameter and 0.22 numerical aperture).

### Optimization of light stimulation parameters in Neuro2A cells

To minimize near-UV induced cytotoxicity, we selected 466 nm blue LEDs to activate TALE-CRY2, a wavelength slightly red-shifted from the CRY2 absorption maxima of 450 nm but still maintaining over 80% activity<sup>14</sup> (**Extended Data Fig. 2a**). To minimize light exposure, we selected a mild stimulation protocol (1 s light pulses at 0.067 Hz,  $\sim 7\%$  duty cycle). This was based on our finding that light duty cycle had no significant effect on LITE-mediated transcriptional activation over a wide range of duty cycle parameters (1.7% to 100% duty cycles, **Extended Data Fig. 2b**). Illumination with a range of light intensities from 0 to 10 mW/cm<sup>2</sup> revealed that *Ngn2* mRNA levels increased as a function of intensity up to 5 mW/cm<sup>2</sup>.

However, increases in *Ngn2* mRNA levels declined at 10 mW/cm<sup>2</sup> (**Extended Data Fig. 2c**), suggesting that higher intensity light may have detrimental effects on either LITE function or on cell physiology. To better characterize this observation, we performed an ethidium homodimer-1 cytotoxicity assay with a calcein counterstain for living cells and found a significantly higher percentage of ethidium-positive cells at the higher stimulation intensity of 10 mW/cm<sup>2</sup>.

Conversely, the ethidium-positive cell count from 5 mW/cm<sup>2</sup> stimulation was indistinguishable from unstimulated controls (**Extended Data Fig. 2d**). Thus 5 mW/cm<sup>2</sup> appeared to be optimal for achieving robust LITE activation while maintaining low cytotoxicity.

**Reduction of light-induced toxicity in primary neurons:** Initial application of LITEs in neurons revealed that cultured neurons were much more sensitive to blue light than Neuro 2a cells. Stimulation parameters previously optimized for Neuro 2a cells (466 nm, 5 mW/cm<sup>2</sup> intensity, 7% duty cycle with 1 s light pulse at 0.067 Hz for a total of 24 h) caused >50% toxicity in primary neurons. We therefore tested survival with a lower duty cycle, as we had previously observed that a wide range of duty cycles had little effect on LITE-mediated transcriptional activation (**Extended Data Fig. 2b**). A reduced duty cycle of 0.8% (0.5 s light pulses at 0.0167 Hz) at the same light intensity (5 mW/cm<sup>2</sup>) was sufficient to maintain a high survival rate that was indistinguishable from that of unstimulated cultures (**Extended Data Fig. 5a**).

### Light propagation and toxicity in *in vivo* experiments

Previous studies have investigated the propagation efficiency of different wavelengths of light in brain tissue. For 473 nm light (wavelength used in this study), there was a >90% attenuation after passing through 0.35 mm of tissue<sup>15</sup>. An estimated 5 mW/cm<sup>2</sup> light power density was estimated based on a tissue depth of 0.35 mm of tissue (the diameter of brain punch used in this study) and a total power output of 5 mW. The light stimulation duty cycle used *in vivo* was the same (0.8%, 0.5 s at 0.0167 Hz) as that used for primary neurons (**Extended Data Fig. 5a**).

### CRY2 absorption spectrum

An illustration of the absorption spectrum of CRY2 was shown in **Extended Data Fig. 2a**. The spectrum showed a sharp drop in absorption above 480 nm<sup>1</sup>. Wavelengths > 500 nm were virtually not absorbed, which could be useful for future multimodal optical control with yellow or red-light sensitive proteins.

### Development of AAV1 supernatant process

Traditional AAV particle generation require laborious production and purification processes, making the testing of many constructs in parallel impractical<sup>16</sup>. In this study, a simple yet highly

effective process of AAV production using filtered supernatant from transfected 293FT cells (**Extended Data Fig. 4**). A previous study indicated that AAV particles produced in 293FT cells could be found not only within the cytoplasm but also in considerable amounts within the culture media<sup>17</sup>. The ratio of viral particles between the supernatant and cytosol of host cells varied depending on the AAV serotype, and secretion was enhanced if polyethylenimine (PEI) was used to transfect the viral packaging plasmids<sup>17</sup>.

In the current study, we demonstrated that  $2 \times 10^5$  293FT cells transfected with AAV vectors carrying TALEs (**Extended Data Fig. 2b**) and packaged using AAV1 serotype were capable of producing 250  $\mu$ l of AAV1 at a concentration of  $5.6 \pm 0.24 \times 10^{10}$  DNaseI resistant genome copies (GC) per mL. 250  $\mu$ l of filtered supernatant was able to transduce 150,000 primary cortical neurons at efficiencies of 80-90% (**Fig. 2b** and **Extended Data Fig. 4b**). This process was also successfully adapted to a 96-well format, enabling the production of 125  $\mu$ l AAV1 supernatant from up to 96 different constructs in parallel. 35  $\mu$ l of supernatant can then be used to transduce one well of primary neurons cultured in 96-well format, enabling transductions in biological triplicates from a single well.

### Modification strategies for background elimination

**CRY2PHR-VP64 Constructs:** Three new constructs were designed with the goal of improving CRY2PHR-VP64 nuclear import. First, the mutations L70A and L74A within a predicted endogenous nuclear export sequence of CRY2PHR were induced to limit nuclear export of the protein (referred to as ‘\*’ in the Effector column of **Extended Data Fig. 6**). Second, the  $\alpha$ -importin nuclear localization sequence was fused to the N-terminus of CRY2PHR-VP64 (referred to as ‘A’ in the Effector column of **Extended Data Fig. 6**). Third, the SV40 nuclear localization sequence was fused to the C-terminus of CRY2PHR-VP64 (referred to as ‘P’ in the Effector column of **Extended Data Fig. 6**).

**TALE-CIB1 Linkers:** The SV40 NLS linker between TALE and CIB1 used in LITE 1.0 was replaced with one of several linkers designed to increase nuclear export of the TALE-CIB1 protein (The symbols used in the CIB1 Linker column of **Extended Data Fig. 6** are shown in parentheses): a flexible glycine-serine linker (G), an adenovirus type 5 E1B nuclear export

sequence (W), an HIV nuclear export sequence (M), a MAPKK nuclear export sequence (K), and a PTK2 nuclear export sequence (P).

**NLS\* Endogenous CIB1 Nuclear Localization Sequence Mutation:** A nuclear localization signal exists within the wild type CIB1 sequence. This signal was mutated in NLS\* constructs at K92A, R93A, K105A, and K106A in order to diminish TALE-CIB1 nuclear localization (referred to as 'N' in the NLS\* column of **Extended Data Fig. 6**).

**$\Delta$ CIB1 Transcription Factor Homology Deletions:** In an effort to eliminate possible basal CIB1 transcriptional activation, deletion constructs were designed in which regions of high homology to basic helix-loop-helix transcription factors in higher plants were removed. These deleted regions consisted of  $\Delta$ aa230-256,  $\Delta$ aa276-307,  $\Delta$ aa308-334 (referred to as '1' '2' and '3' in the  $\Delta$ CIB1 column of **Extended Data Fig. 6**). In each case, the deleted region was replaced with a 3 residue GGS link.

**NES Insertions into CIB1:** One strategy to facilitate light-dependent nuclear import of TALE-CIB1 was to insert an NES in CIB1 at its dimerization interface with CRY2PHR such that the signal would be concealed upon binding with CRY2PHR. To this end, an NES was inserted at different positions within the known CRY2 interaction domain CIBN (aa 1-170). The positions are as follows (The symbols used in the NES column of **Extended Data Fig. 6** are shown in parentheses): aa28 (1), aa52 (2), aa73 (3), aa120 (4), aa140 (5), aa160 (6).

**\*bHLH basic Helix-Loop-Helix Mutation:** To reduce direct CIB1-DNA interactions, several basic residues of the basic helix-loop-helix region in CIB1 were mutated. The following mutations are present in all \*bHLH constructs (referred to as 'B' in the \*bHLH column of **Extended Data Fig. 6**): R175A, G176A, R187A, and R189A.

**Supplementary Table 1 | HDAC Recruiter Effector Domains**

| Subtype/<br>Complex | Name         | Substrate<br>(if<br>known) | Modification<br>(if known) | Organism             | Full<br>size<br>(aa) | Selected<br>truncation (aa) | Final<br>size<br>(aa) | Catalytic domain                 |
|---------------------|--------------|----------------------------|----------------------------|----------------------|----------------------|-----------------------------|-----------------------|----------------------------------|
| Sin3a               | <b>MeCP2</b> | -                          | -                          | <i>R. norvegicus</i> | 492                  | 207-492 <sup>18</sup>       | 286                   | -                                |
| Sin3a               | <b>MBD2b</b> | -                          | -                          | <i>H. sapiens</i>    | 262                  | 45-262 <sup>19</sup>        | 218                   | -                                |
| Sin3a               | <b>Sin3a</b> | -                          | -                          | <i>H. sapiens</i>    | 1273                 | 524-851 <sup>20</sup>       | 328                   | 627-829:<br>HDAC1<br>interaction |
| NcoR                | <b>NcoR</b>  | -                          | -                          | <i>H. sapiens</i>    | 2440                 | 420-488 <sup>21</sup>       | 69                    | -                                |
| NuRD                | <b>SALL1</b> | -                          | -                          | <i>M. musculus</i>   | 1322                 | 1-93 <sup>22</sup>          | 93                    | -                                |
| CoREST              | <b>RCOR1</b> | -                          | -                          | <i>H. sapiens</i>    | 482                  | 81-300 <sup>23,24</sup>     | 220                   | -                                |

Supplementary Table 2 | HDAC Effector Domains

| Subtype/<br>Complex | Name           | Substrate<br>(if known)      | Modification<br>(if known) | Organism             | Full<br>size<br>(aa) | Selected<br>truncation<br>(aa) | Final<br>size<br>(aa) | Catalytic<br>domain |
|---------------------|----------------|------------------------------|----------------------------|----------------------|----------------------|--------------------------------|-----------------------|---------------------|
| HDAC I              | <b>HDAC 8</b>  | -                            | -                          | <i>X. laevis</i>     | 325                  | 1-325                          | 325                   | 1-272: HDAC         |
| HDAC I              | <b>RPD3</b>    | -                            | -                          | <i>S. cerevisiae</i> | 433                  | 19-340                         | 322 <sup>25</sup>     | 19-331: HDAC        |
| HDAC IV             | <b>MesoLo4</b> | -                            | -                          | <i>M. loti</i>       | 300                  | 1-300 <sup>26</sup>            | 300                   | -                   |
| HDAC IV             | <b>HDAC 11</b> | -                            | -                          | <i>H. sapiens</i>    | 347                  | 1-347 <sup>27</sup>            | 347                   | 14-326: HDAC        |
| HD2                 | <b>HDT1</b>    | -                            | -                          | <i>A. thaliana</i>   | 245                  | 1-211 <sup>28</sup>            | 211                   | -                   |
| SIRT I              | <b>SIRT3</b>   | H3K9Ac<br>H4K16Ac<br>H3K56Ac | -                          | <i>H. sapiens</i>    | 399                  | 143-399 <sup>29</sup>          | 257                   | 126-382: SIRT       |
| SIRT I              | <b>HST2</b>    | -                            | -                          | <i>C. albicans</i>   | 331                  | 1-331 <sup>30</sup>            | 331                   | -                   |
| SIRT I              | <b>CobB</b>    | -                            | -                          | <i>E. coli (K12)</i> | 242                  | 1-242 <sup>31</sup>            | 242                   | -                   |
| SIRT I              | <b>HST2</b>    | -                            | -                          | <i>S. cerevisiae</i> | 357                  | 8-298 <sup>32</sup>            | 291                   | -                   |
| SIRT III            | <b>SIRT5</b>   | H4K8Ac<br>H4K16Ac            | -                          | <i>H. sapiens</i>    | 310                  | 37-310 <sup>33</sup>           | 274                   | 41-309: SIRT        |
| SIRT III            | <b>Sir2A</b>   | -                            | -                          | <i>P. falciparum</i> | 273                  | 1-273 <sup>34</sup>            | 273                   | 19-273: SIRT        |
| SIRT IV             | <b>SIRT6</b>   | H3K9Ac<br>H3K56Ac            | -                          | <i>H. sapiens</i>    | 355                  | 1-289 <sup>35</sup>            | 289                   | 35-274: SIRT        |



**Supplementary Table 3 | Histone Methyltransferase (HMT) Effector Domains**

| Subtype/<br>Complex             | Name                  | Substrate<br>(if<br>known) | Modification<br>(if known) | Organism                               | Full<br>size (aa) | Selected<br>truncation<br>(aa) | Final<br>size<br>(aa) | Catalytic<br>domain                   |
|---------------------------------|-----------------------|----------------------------|----------------------------|----------------------------------------|-------------------|--------------------------------|-----------------------|---------------------------------------|
| SET                             | <b>NUE</b>            | H2B,<br>H3, H4             | -                          | <i>C. trachomatis</i>                  | 219               | 1-219 <sup>36</sup>            | 219                   | -                                     |
| SET                             | <b>vSET</b>           | -                          | H3K27me3                   | <i>P. bursaria<br/>chlorella virus</i> | 119               | 1-119 <sup>37</sup>            | 119                   | 4-112: SET2                           |
| SUV39<br>family                 | <b>EHMT<br/>2/G9A</b> | H1.4K2,<br>H3K9,<br>H3K27  | H3K9me1/<br>2,<br>H1K25me1 | <i>M. musculus</i>                     | 1263              | 969-1263 <sup>38</sup>         | 295                   | 1025-1233:<br>preSET, SET,<br>postSET |
| SUV39                           | <b>SUV39<br/>H1</b>   | -                          | H3K9me2/<br>3              | <i>H. sapiens</i>                      | 412               | 79-412 <sup>39</sup>           | 334                   | 172-412:<br>preSET, SET,<br>postSET   |
| Suvar3-9                        | <b>dim-5</b>          | -                          | H3K9me3                    | <i>N. crassa</i>                       | 331               | 1-331 <sup>40</sup>            | 331                   | 77-331:<br>preSET, SET,<br>postSET    |
| Suvar3-9<br>(SUVH<br>subfamily) | <b>KYP</b>            | -                          | H3K9me1/<br>2              | <i>A. thaliana</i>                     | 624               | 335-601                        | 267 <sup>41</sup>     | -                                     |
| Suvar3-9<br>(SUVR<br>subfamily) | <b>SUVR4</b>          | H3K9me<br>1                | H3K9me2/<br>3              | <i>A. thaliana</i>                     | 492               | 180-492                        | 313 <sup>42</sup>     | 192-462:<br>preSET, SET,<br>postSET   |
| Suvar4-20                       | <b>SET4</b>           | -                          | H4K20me3                   | <i>C. elegans</i>                      | 288               | 1-288 <sup>43</sup>            | 288                   | -                                     |
| SET8                            | <b>SET1</b>           | -                          | H4K20me1                   | <i>C. elegans</i>                      | 242               | 1-242 <sup>43</sup>            | 242                   | -                                     |
| SET8                            | <b>SETD8</b>          | -                          | H4K20me1                   | <i>H. sapiens</i>                      | 393               | 185-393                        | 209 <sup>44</sup>     | 256-382: SET                          |
| SET8                            | <b>TgSET<br/>8</b>    | -                          | H4K20me1<br>/2/3           | <i>T. gondii</i>                       | 1893              | 1590-1893 <sup>45</sup>        | 304                   | 1749-1884:<br>SET                     |

**Supplementary Table 4 | Histone Methyltransferase (HMT) Recruiter Effector Domains**

| Subtype/<br>Complex | Name         | Substrate<br>(if<br>known) | Modification<br>(if known) | Organism           | Full<br>size (aa) | Selected<br>truncation<br>(aa)          | Final<br>size<br>(aa) | Catalytic<br>domain      |
|---------------------|--------------|----------------------------|----------------------------|--------------------|-------------------|-----------------------------------------|-----------------------|--------------------------|
| -                   | <b>Hp1a</b>  | -                          | H3K9me3                    | <i>M. musculus</i> | 191               | 73-191                                  | 119 <sup>46</sup>     | 121-179:<br>chromoshadow |
| -                   | <b>PHF19</b> | -                          | H3K27me3                   | <i>H. sapiens</i>  | 580               | (1-250) +<br>GGSG linker<br>+ (500-580) | 335 <sup>47</sup>     | 163-250: PHD2            |
| -                   | <b>NIPP1</b> | -                          | H3K27me3                   | <i>H. sapiens</i>  | 351               | 1-329 <sup>48</sup>                     | 329                   | 310-329: EED             |

**Supplementary Table 5 | Histone Acetyltransferase Inhibitor Effector Domains**

| Subtype/<br>Complex | Name                                    | Substrate<br>(if<br>known) | Modification<br>(if known) | Organism           | Full<br>size (aa) | Selected<br>truncation<br>(aa) | Final<br>size<br>(aa) | Catalytic<br>domain |
|---------------------|-----------------------------------------|----------------------------|----------------------------|--------------------|-------------------|--------------------------------|-----------------------|---------------------|
| -                   | <b>SET/TA<br/>F-1<math>\beta</math></b> | -                          | -                          | <i>M. musculus</i> | 289               | 1-289 <sup>49</sup>            | 289                   | -                   |

Supplementary Table 6 | genomic sequences targeted by TALEs (5' to 3')

|                        |                  |
|------------------------|------------------|
| <i>5-HT1B</i>          | TATCTGAACTCTCC   |
| <i>5-HTT</i>           | TGTCTGTCTTGCAT   |
| <i>Arc</i>             | TGGCTGTTGCCAGG   |
| <i>BDNF</i>            | TACCTGGAGCTAGC   |
| <i>c-Fos</i>           | TACACAGGATGTCC   |
| <i>DNMT3a</i>          | TTGGCCCTGTGCAG   |
| <i>DNMT3b</i>          | TAGCGCAGCGATCG   |
| <i>gad65</i>           | TATTGCCAAGAGAG   |
| <i>gad67</i>           | TGACTGGAACATAC   |
| <i>GR (GCR, NR3C1)</i> | TGATGGACTTGTAT   |
| <i>HAT1</i>            | TGGACCTTCTCCCT   |
| <i>HCRTR1</i>          | TAGGTCTCCTGGAG   |
| <i>HCRTR2</i>          | TGGCTCAGGAACTT   |
| <i>HDAC1</i>           | TTCTCTAAGCTGCC   |
| <i>HDAC2</i>           | TGAGCCCTGGAGGA   |
| <i>HDAC4</i>           | TGCCTAAGATGGAG   |
| <i>JMJD2A</i>          | TGTAGTGAGTGTTT   |
| <i>MCH-R1</i>          | TGTCTAGGTGATGT   |
| <i>NET</i>             | TCTCTGCTAGAAGG   |
| <i>Scn1a</i>           | TCTAGGTCAAGTGT   |
| <i>SIRT1</i>           | TCCTCTGCTCCGCT   |
| <i>tet1</i>            | TCTAGGAGTGTAGC   |
| <i>tet3</i>            | TGCCTGGCTGCTGG   |
| <i>5-HT1B</i>          | TATCTGAACTCTCC   |
| <i>Grm2</i>            | TCAGAGCTGTCCTC   |
| <i>Grm5</i>            | TGCAAGAGTAGGAG   |
| <i>5-HT2A</i>          | TAGTGACTGATTCC   |
| <i>Grin2a</i>          | TTGGAGGAGCACCA   |
| <i>Neurog2</i>         | TGAATGATGATAATAC |

**Supplementary Table 7** | Product information for all Taqman probes (Life Technologies)

| <b>Target</b>           | <b>Species</b> | <b>Probe #</b> |
|-------------------------|----------------|----------------|
| <i>Ngn2</i>             | mouse          | Mm00437603_g1  |
| <i>Grm5 (mGluR5)</i>    | mouse          | Mm00690332_m1  |
| <i>Grm2 (mGluR2)</i>    | mouse          | Mm01235831_m1  |
| <i>Grin2a (NMDAR2A)</i> | mouse          | Mm00433802_m1  |
| <i>GAPD (GAPDH)</i>     | mouse          | 4352932E       |
| <i>KLF4</i>             | human          | Hs00358836_m1  |
| <i>GAPD (GAPDH)</i>     | human          | 4352934E       |
| <i>WPRE</i>             | custom         |                |
| <i>5-HT1A</i>           | mouse          | Mm00434106_s1  |
| <i>5-HT1B</i>           | mouse          | Mm00439377_s1  |
| <i>5-HTT</i>            | mouse          | Mm00439391_m1  |
| <i>Arc</i>              | mouse          | Mm00479619_g1  |
| <i>BDNF</i>             | mouse          | Mm04230607_s1  |
| <i>c-Fos</i>            | mouse          | Mm00487425_m1  |
| <i>CBP/P300</i>         | mouse          | Mm01342452_m1  |
| <i>CREB</i>             | mouse          | Mm00501607_m1  |
| <i>CRHR1</i>            | mouse          | Mm00432670_m1  |
| <i>DNMT1</i>            | mouse          | Mm01151063_m1  |
| <i>DNMT3a</i>           | mouse          | Mm00432881_m1  |
| <i>DNMT3b</i>           | mouse          | Mm01240113_m1  |
| <i>egr-1 (zif-268)</i>  | mouse          | Mm00656724_m1  |
| <i>Gad65</i>            | mouse          | Mm00484623_m1  |
| <i>Gad67</i>            | mouse          | Mm00725661_s1  |
| <i>GR (GCR, NR3C1)</i>  | mouse          | Mm00433832_m1  |
| <i>HAT1</i>             | mouse          | Mm00509140_m1  |
| <i>HCRTR1</i>           | mouse          | Mm01185776_m1  |
| <i>HCRTR2</i>           | mouse          | Mm01179312_m1  |
| <i>HDAC1</i>            | mouse          | Mm02391771_g1  |
| <i>HDAC2</i>            | mouse          | Mm00515108_m1  |
| <i>HDAC4</i>            | mouse          | Mm01299557_m1  |
| <i>JMJD2A</i>           | mouse          | Mm00805000_m1  |
| <i>M1 (CHRM1)</i>       | mouse          | Mm00432509_s1  |
| <i>MCH-R1</i>           | mouse          | Mm00653044_m1  |
| <i>NET (SLC6A2)</i>     | mouse          | Mm00436661_m1  |
| <i>NR2B subunit</i>     | mouse          | Mm00433820_m1  |
| <i>OXTR</i>             | mouse          | Mm01182684_m1  |
| <i>Scn1a</i>            | mouse          | Mm00450580_m1  |
| <i>SIRT1</i>            | mouse          | Mm00490758_m1  |
| <i>Tet1</i>             | mouse          | Mm01169087_m1  |
| <i>Tet2</i>             | mouse          | Mm00524395_m1  |
| <i>Tet3</i>             | mouse          | Mm00805756_m1  |

**Supplementary Table 8** | Clone, product numbers and concentrations for antibodies used in this study

**Primary Antibodies**

| Target                             | Host    | Clone #    | Manufacturer   | Product # | IsoType | Concentration |
|------------------------------------|---------|------------|----------------|-----------|---------|---------------|
| <b>mGluR2</b>                      | mouse   | mG2Na-s    | Abcam          | Ab15672   | IgG     | 1:1000        |
| <b><math>\alpha</math>-tubulin</b> | mouse   | B-5-1-2    | Sigma-Aldrich  | T5168     | IgG1    | 1:20000       |
| <b>NeuN</b>                        | mouse   | A60        | Millipore      | MAB377    | IgG1    | 1:200         |
| <b>HA (Alexa Fluor 504 GFP)</b>    | mouse   | 6E2        | Cell Signaling | 3444      | IgG1    | 1:100         |
|                                    | chicken | polyclonal | Aves Labs      | GFP-1020  | IgY     | 1:500         |

| Target             | Host | Conjugate       | Manufacturer      | Product # | Concentration |
|--------------------|------|-----------------|-------------------|-----------|---------------|
| <b>mouse IgG</b>   | goat | HRP             | Sigma-Aldrich     | A9917     | 1:5000-10000  |
| <b>mouse IgG</b>   | goat | Alexa Fluor 594 | Life Technologies | A11005    | 1:1000        |
| <b>chicken IgG</b> | Goat | Alexa Fluor 488 | Life Technologies | A11039    | 1:1000        |

| Target          | Host   | Epitope    | Manufacturer | Product # | IsoType | Concentration  |
|-----------------|--------|------------|--------------|-----------|---------|----------------|
| <b>H3K9me1</b>  | mouse  | 1-18       | Millipore    | 17-680    | IgG     | 2 $\mu$ l/IP   |
| <b>H3K9me2</b>  | mouse  | 1-18       | Millipore    | 17-681    | IgG     | 4 $\mu$ l/IP   |
| <b>H3K9Ac</b>   | rabbit | polyclonal | Millipore    | 17-658    | IgG     | 3 $\mu$ g/IP   |
| <b>H4K20me1</b> | rabbit | 15-24      | Millipore    | 17-651    | IgG     | 4 $\mu$ g/IP   |
| <b>H4K8Ac</b>   | rabbit | polyclonal | Millipore    | 17-10099  | IgG     | 1.5 $\mu$ l/IP |
| <b>H4K20me3</b> | rabbit | 18-22      | Millipore    | 17-671    | IgG     | 7 $\mu$ l/IP   |
| <b>H3K27me3</b> | rabbit | polyclonal | Millipore    | 17-622    | IgG     | 4 $\mu$ g/IP   |

**Supplementary Table 9 | Viral transduction and light stimulation parameters for *in vivo* LITE-mediated activation of *Grm2* in the mouse infralimbic cortex (ILC).** *Grm2* mRNA levels in the ipsilateral LITE-expressing hemisphere are compared with the contralateral mCherry-expressing control hemisphere for all three experimental conditions shown in **Fig. 3h**.

| <i>Experimental condition</i> | <i>ILC Hemisphere (ipsilateral)</i> |                          | <i>ILC Hemisphere (contralateral)</i> |
|-------------------------------|-------------------------------------|--------------------------|---------------------------------------|
|                               | <b>AAV vector</b>                   | <b>Light stimulation</b> | <b>AAV vector</b>                     |
| GFP                           | GFP                                 | yes                      | mCherry                               |
| LITEs / no Light              | TALE-CIB1::CRY2PHR-VP64             | no                       | mCherry                               |
| LITEs / + Light               | TALE-CIB1::CRY2PHR-VP64             | yes                      | mCherry                               |

**Supplementary Table 10 | qPCR primers used for CHIP-qPCR**

| <b>target</b>                 | <b>Primers</b>                                                             |
|-------------------------------|----------------------------------------------------------------------------|
| <i>Grm2</i> promoter          | Forward: CTGTGCTGAAGGATCTGGGG<br>Reverse: ATGCTGCAGGCATAGGACAA             |
| <i>Neurog2</i> promoter       | Forward: GAGGGGGAGAGGGACTAAAGA<br>Reverse: GCTCTCCCTCCCCAGCTTA             |
| <i>Myt-1</i> promoter control | Cell Signaling Technologies SimpleChIP® Mouse MYT-1 Promoter Primers #8985 |
| <i>RPL30</i> Intron 2 control | Cell Signaling Technologies SimpleChIP® Mouse RPL30 Intron 2 Primers #7015 |

## Supplementary Sequences

### > TALE(*Ngn2*)-NLS-CRY2

MSRTRLPSPPAPSPAFSADSFSDLLRQFDPSLFNTSLFDSLPPFGAHHTEAATGEWDEVQSGLRAADAPPPT  
 MRVAVTAARPPRAKAPRRRAAQPSDASPAAQVDLRTLGYSSQQQEKIKPKVRSSTVAQHHEALVGHGFT  
 HAHIVALSQHPAALGTVAVKYQDMIAALPEATHEAIVGVGKQWSGARALEALLTVAGELRGPPLQLDTGQ  
 LLKIAKRGVTAVEAVHAWRNALTGAPLNLTPEQVVAIASNNGGKQALETVQRLLPVLCQAHGLTPEQV  
 VAIASNNGGKQALETVQRLLPVLCQAHGLTPEQVVAIASNNGGKQALETVQRLLPVLCQAHGLTPEQVVA  
 IASNIGGKQALETVQRLLPVLCQAHGLTPEQVVAIASNIGGKQALETVQRLLPVLCQAHGLTPEQVVAIASN  
 GGGKQALETVQRLLPVLCQAHGLTPEQVVAIASNNGGKQALETVQRLLPVLCQAHGLTPEQVVAIASNIG  
 GKQALETVQRLLPVLCQAHGLTPEQVVAIASNNGGKQALETVQRLLPVLCQAHGLTPEQVVAIASNNGGK  
 QALETVQRLLPVLCQAHGLTPEQVVAIASNIGGKQALETVQRLLPVLCQAHGLTPEQVVAIASNNGGKQAL  
 ETVQRLLPVLCQAHGLTPEQVVAIASNIGGKQALETVQRLLPVLCQAHGLTPEQVVAIASNIGGKQALETV  
 QRLLPVLCQAHGLTPEQVVAIASNNGGKQALETVQRLLPVLCQAHGLTPEQVVAIASNIGGKQALETVQRL  
 LPVLCQAHGLTPEQVVAIASHDGGRPALESIVAQLSRPDALAALNDHLVALACLGGRPALDAVKKGLPH  
 APALIKRTNRRIPERTSHRVADHAQVVRVLGFFQCHSHPAQAFDDAMTQFGMSRHGLLQLFRRVGVTELE  
 ARSGTLPPASQRWDRILQASGMKRAKPSPTSTQTPDQASLHAFADSLERDLDAQSPMHEGDQTRASASPKK  
 KRKVEASKMDKKTIVWFRDLRIEDNPALAAAHEGSVFPVFIWCPEEEGQFYPGRASRWWMKQSLAHL  
 SQSLKALGSDLTLIKTHNTISAILDCIRVTGATKVVFNHLYDPVSLVRDHTVKEKLVERGISVQSYNGDLLY  
 EPWEIYCEKGPFTSFNSYWKKCLDMSIESVMLPPPWRMPITAAAIAWACSIIEELGLENEAEKPSNALLT  
 RAWSPGWSNADKLLNEFIEKQLIDYAKNSKKVVGNSTSLLSPYLHFGEISVRHVFQARMKQIIWARDKNS  
 EGEESADLFLRGIGLREYSRYICFNFPFTHEQSLLSHLRFPWDADVDKFKAWRQGRGTGYPLVDAGMRELW  
 ATGWMHNRIRVIVSSFVAVKFLLLPWKWMKYFWDTLLDADLECDILGWQYISGSIPDGHELDRLDNPALQ  
 GAKYDPEGEYIRQWLPELARLPTEWIHPWDAPLTVLKASGVELGTNYAKPIVDIDTARELLAKAISRTRE  
 AQIMIGAAPDEIVADSFEALGANTIKEPGLCPSVSSNDQVPSAVRYNGSKRVKPEEEERDMKKSRGFDER  
 ELFSTAESSSSSVFFVSQCSLASEGKNLEGIQDSSDQITTSLGKNG

### > TALE(*Ngn2*)-NLS-CRY2PHR

MSRTRLPSPPAPSPAFSADSFSDLLRQFDPSLFNTSLFDSLPPFGAHHTEAATGEWDEVQSGLRAADAPPPT  
 MRVAVTAARPPRAKAPRRRAAQPSDASPAAQVDLRTLGYSSQQQEKIKPKVRSSTVAQHHEALVGHGFT  
 HAHIVALSQHPAALGTVAVKYQDMIAALPEATHEAIVGVGKQWSGARALEALLTVAGELRGPPLQLDTGQ  
 LLKIAKRGVTAVEAVHAWRNALTGAPLNLTPEQVVAIASNNGGKQALETVQRLLPVLCQAHGLTPEQV  
 VAIASNNGGKQALETVQRLLPVLCQAHGLTPEQVVAIASNNGGKQALETVQRLLPVLCQAHGLTPEQVVA  
 IASNIGGKQALETVQRLLPVLCQAHGLTPEQVVAIASNIGGKQALETVQRLLPVLCQAHGLTPEQVVAIASN  
 GGGKQALETVQRLLPVLCQAHGLTPEQVVAIASNNGGKQALETVQRLLPVLCQAHGLTPEQVVAIASNIG  
 GKQALETVQRLLPVLCQAHGLTPEQVVAIASNNGGKQALETVQRLLPVLCQAHGLTPEQVVAIASNNGGK  
 QALETVQRLLPVLCQAHGLTPEQVVAIASNIGGKQALETVQRLLPVLCQAHGLTPEQVVAIASNNGGKQAL  
 ETVQRLLPVLCQAHGLTPEQVVAIASNIGGKQALETVQRLLPVLCQAHGLTPEQVVAIASNIGGKQALETV  
 QRLLPVLCQAHGLTPEQVVAIASNNGGKQALETVQRLLPVLCQAHGLTPEQVVAIASNIGGKQALETVQRL  
 LPVLCQAHGLTPEQVVAIASHDGGRPALESIVAQLSRPDALAALNDHLVALACLGGRPALDAVKKGLPH  
 APALIKRTNRRIPERTSHRVADHAQVVRVLGFFQCHSHPAQAFDDAMTQFGMSRHGLLQLFRRVGVTELE  
 ARSGTLPPASQRWDRILQASGMKRAKPSPTSTQTPDQASLHAFADSLERDLDAQSPMHEGDQTRASASPKK  
 KRKVEASKMDKKTIVWFRDLRIEDNPALAAAHEGSVFPVFIWCPEEEGQFYPGRASRWWMKQSLAHL  
 SQSLKALGSDLTLIKTHNTISAILDCIRVTGATKVVFNHLYDPVSLVRDHTVKEKLVERGISVQSYNGDLLY  
 EPWEIYCEKGPFTSFNSYWKKCLDMSIESVMLPPPWRMPITAAAIAWACSIIEELGLENEAEKPSNALLT  
 RAWSPGWSNADKLLNEFIEKQLIDYAKNSKKVVGNSTSLLSPYLHFGEISVRHVFQARMKQIIWARDKNS

EGEESADLFLRGIGLREYSRYICFNFPFTHQSLLSHLRFFPWDADVDKFKAWRQGRGTGYPLVDAGMRELW  
 ATGWMHNRIRVIVSSFAVKFLLLPWKWGMKYFWDTLLDADLECDILGWQYISGSIPDGHELDRLDNPALQ  
 GAKYDPEGEYIRQWLPELARLPTEWIHPWDAPLTVLKASGVELGTNYAKPIVDIDTARELLAKAISRTRE  
 AQIMIGAAP

> **CIB1-NLS-VP64\_2A\_GFP**

MNGAIGGDLLLNFDPMSVLERQRAHLKYLNPFTDSPLAGFFADSSMITGGEMDSYLSTAGLNLPMMYGET  
 TVEGDSRLSISPETTLGTGNFKKRKFDTEKDCNEKMKMTMNRDDLVEEGEEKSKITEQNGSTKSIKK  
 MKHKAKKEENNFSNDSSKVTKELEKTDYIHVRARRGQATDSHSIAERVRREKISERMKFLQDLVPGCDKIT  
 GKAGMLDEIINYVQSLQRQIEFLSMKLAIVNPRPDFMDDIFAKEVASTPMTVVPSPPEMVLGYSHEMVHS  
 GYSSEMVSNGYLVNPMQVNTSSDPLSCFNNGEAPSMWDSHVQNLVGNLGVASPKKKRKRKVEASGSGR  
 ADALDDFDLMLGSDALDDFDLMLGSDALDDFDLMLGSDALDDFDLMLINSRGSGEGRGSLLTCGD  
 VEENPGPVSKGEELFTGVVPIVELDGDVNGHKFSVSGEGEGDATYGKLTCLKFICTTGKLPVPWPTLVTTLT  
 YGVQCFSRYPDHMKQHDFFKSAMPEGYVQERTIFFKDDGNYKTRAEVKFEGDTLVNRIELKGIDFKEDGNI  
 LGHKLEYNYNSHNVIYIMADKQKNGIKVNFKIRHNIEDGSVQLADHYQQNTPIGDGPVLLPDNHYLSTQSA  
 LSKDPNEKRDHMLLEFVTAAGITLGMDELYK

> **CIBN-NLS-VP64\_2A\_GFP**

MNGAIGGDLLLNFDPMSVLERQRAHLKYLNPFTDSPLAGFFADSSMITGGEMDSYLSTAGLNLPMMYGET  
 TVEGDSRLSISPETTLGTGNFKKRKFDTEKDCNEKMKMTMNRDDLVEEGEEKSKITEQNGSTKSIKK  
 MKHKAKKEENNFSNDSSKVTKELEKTDYIASPKKKRKRKVEASGSGRADALDDFDLMLGSDALDDFDLDM  
 LGSDALDDFDLMLGSDALDDFDLMLINSRGSGEGRGSLLTCGDVEENPGPVSKGEELFTGVVPIVELD  
 GDVNGHKFSVSGEGEGDATYGKLTCLKFICTTGKLPVPWPTLVTTLYGVQCFSRYPDHMKQHDFFKSAMP  
 EGYVQERTIFFKDDGNYKTRAEVKFEGDTLVNRIELKGIDFKEDGNILGHKLEYNYNSHNVIYIMADKQKN  
 GIKVNFKIRHNIEDGSVQLADHYQQNTPIGDGPVLLPDNHYLSTQSALS KDPNEKRDHMLLEFVTAAGITL  
 GMDELYK

> **CIB1-NLS-VP16\_2A\_GFP**

MNGAIGGDLLLNFDPMSVLERQRAHLKYLNPFTDSPLAGFFADSSMITGGEMDSYLSTAGLNLPMMYGET  
 TVEGDSRLSISPETTLGTGNFKKRKFDTEKDCNEKMKMTMNRDDLVEEGEEKSKITEQNGSTKSIKK  
 MKHKAKKEENNFSNDSSKVTKELEKTDYIHVRARRGQATDSHSIAERVRREKISERMKFLQDLVPGCDKIT  
 GKAGMLDEIINYVQSLQRQIEFLSMKLAIVNPRPDFMDDIFAKEVASTPMTVVPSPPEMVLGYSHEMVHS  
 GYSSEMVSNGYLVNPMQVNTSSDPLSCFNNGEAPSMWDSHVQNLVGNLGVASPKKKRKRKVEASAPPTD  
 VSLGDELHLDGEDVAMAHADALDDFDLMLGDGDSGPGFTPHDSAPYGALDMADFEFEQMFTDALGID  
 EYGGEPGIRRSRGSGEGRGSLLTCGDVEENPGPVSKGEELFTGVVPIVELDGDVNGHKFSVSGEGEGDAT  
 YGKLTCLKFICTTGKLPVPWPTLVTTLYGVQCFSRYPDHMKQHDFFKSAMPEGYVQERTIFFKDDGNYKT  
 RAEVKFEGDTLVNRIELKGIDFKEDGNILGHKLEYNYNSHNVIYIMADKQKNGIKVNFKIRHNIEDGSVQLA  
 DHYQQNTPIGDGPVLLPDNHYLSTQSALS KDPNEKRDHMLLEFVTAAGITLGMDELYK

> **CIB1-NLS-p65\_2A\_GFP**





> **HA-TALE(12mer)-NLS-CIB1**

MYPYDVPDYAVDLRTLGYSSQQQEKIKPKVRSTVAQHHEALVGHGFTHAHIVALSQHPAALGTVAVKYQ  
 DMIAALPEATHEAIVGVGKQWSGARALEALLTVAGELRGPPLQLDTGQLLKIARKGGVTAVEAVHAWRN  
 ALTGAPLNLTPQVVAIASXXGGKQALETVQRLLPVLCQAHGLTPEQVVAIASXXGGKQALETVQRLLPV  
 LCQAHGLTPEQVVAIASXXGGKQALETVQRLLPVLCQAHGLTPEQVVAIASXXGGKQALETVQRLLPVLC  
 QAHGLTPEQVVAIASXXGGKQALETVQRLLPVLCQAHGLTPEQVVAIASXXGGKQALETVQRLLPVLCQ  
 HGLTPEQVVAIASXXGGKQALETVQRLLPVLCQAHGLTPEQVVAIASXXGGKQALETVQRLLPVLCQAHG  
 LTPEQVVAIASXXGGKQALETVQRLLPVLCQAHGLTPEQVVAIASXXGGKQALETVQRLLPVLCQAHGLT  
 PEQVVAIASXXGGKQALETVQRLLPVLCQAHGLTPEQVVAIASXXGGKQALETVQRLLPVLCQAHGLTPE  
 QVVAIASXXGGRPALESIVAQLSRPDPALAALTNDHLVALACLGGRPALDAVKKGLPHAPALIKRTNRRIP  
 ERTSHRVA**ASPKKKR**K**VEAS**NGAIGDLLLLNFPDMSVLERQRAHLKYLNPFTDPLAGFFADSSMITGGEM  
 DSYLSTAGLNLPMMYGETTVEGDSRLSISPETTLGTGNFKRKFDTETKDCNEKKKKMTMNRDDLVEEGE  
 EEKSKITEQNNGSTKSIKMKHKAKKEENNFSNDSSKVTKLEKTDYIHVRARRGQATDSHSIAERVRREKI  
 SERMKFLQDLVPGCDKITGKAGMLDEIINYVQSLRQIEFLSMKLAIVNPRPDFDMDDIFAKEVASTPMTV  
 VPSPPEMVLSGYSHEMVHSGYSSEMNVNSGYLHVNPQQVNTSSDPLSCFNNGEAPSMWDSHVQNLVGNLGV

> **CRY2PHR-NLS-VP64\_2A\_GFP**

MKMDKKTIVWFRDLRIEDNPALAAAHEGSVFPVFIWCPEEEGQFYPPGRASRWWMKQSLAHLSQLKA  
 LGSDLTLIKHTNTISAILDCIRVTGATKVVFNHLYDPVSLVRDHTVKEKLVVERGISVQSYNGDLLYEPWEIY  
 CEKPKPFTSFNSYWKCLDMSIESVMLPPPWRMPITAAAEAIWACSIIEELGLENEAEKPSNALLTRAWSP  
 GWSNADKLLNEFIEKQLIDYAKNSKKVVGNSTSLLSPYLHFGEISVRHVFQCARMKQIWARDKNSEGEES  
 ADLFLRGIGLREYSRYICFNFPFTHEQSLLSHLRFFPWDADVDKFKAWRQGRGTGYPLVDAGMRELWATGW  
 MHNRRIVIVSSFAVKFLLLPWKWGMKYFWDTLDDADLECDILGWQYISGSIPDGHELDRLDNPALQGAKY  
 DPEGEYIRQWLPELARLPTEWIIHHPWDAPLTVLKASGVELGTNYAKPIVDIDTARELLAKAISRTREAQIMI  
 GAAP**ASPKKKR**K**VEAS**SGGRADALDDFDLDMLGSDALDDFDLDMLGSDALDDFDLDMLGSDALDDFDL  
 DMLINSRGSGEGRGSLLTCGDVEENPGPVSKGEELFTGVVPILVELDGDVNGHKFSVSGEGEDATYGKLT  
 LKFICTTGKLPVPWPTLVTTLTYGVQCFSRYPDHMKQHDFFSAMPEGYVQERTIFFKDDGNYKTRAEVKF  
 EGDTLVNRIELKGIDFKEDGNILGHKLEYNYNSHNVYIMADKQKNGIKVNFKIRHNIEDGSVQLADHYQQN  
 TPIGDGPVLLPDNHYLSTQSALS KDPNEKRDMVLEFVTAAGITLGMDELYKV

> **CRY2PHR-NLS-SID4X\_2A\_phiLOV2.1**

MKMDKKTIVWFRDLRIEDNPALAAAHEGSVFPVFIWCPEEEGQFYPPGRASRWWMKQSLAHLSQLKA  
 LGSDLTLIKHTNTISAILDCIRVTGATKVVFNHLYDPVSLVRDHTVKEKLVVERGISVQSYNGDLLYEPWEIY  
 CEKPKPFTSFNSYWKCLDMSIESVMLPPPWRMPITAAAEAIWACSIIEELGLENEAEKPSNALLTRAWSP  
 GWSNADKLLNEFIEKQLIDYAKNSKKVVGNSTSLLSPYLHFGEISVRHVFQCARMKQIWARDKNSEGEES  
 ADLFLRGIGLREYSRYICFNFPFTHEQSLLSHLRFFPWDADVDKFKAWRQGRGTGYPLVDAGMRELWATGW  
 MHNRRIVIVSSFAVKFLLLPWKWGMKYFWDTLDDADLECDILGWQYISGSIPDGHELDRLDNPALQGAKY  
 DPEGEYIRQWLPELARLPTEWIIHHPWDAPLTVLKASGVELGTNYAKPIVDIDTARELLAKAISRTREAQIMI  
 GAAP**ASPKKKR**K**VEAS**SGGMNIQMLLEAADYLERREREAEHGYASMLPGSGMNIQMLLEAADYLERRER  
 EAEHGYASMLPGSGMNIQMLLEAADYLERREREAEHGYASMLPGSGMNIQMLLEAADYLERREREAEH  
 YASMLPSRSGSGEGRGSLLTCGDVEENPGPIEKSFVITDPRLPDYPIIFASDGFELETEYSREEIMGRNARFL  
 QGPETDQATVQKIRDAIRDQRETTVQLINITYKSGKKFWNLLHLQPVRDRKGGGLQYFIGVQLVGSDDHV

> **TALE(KLF4)-NLS-CRY2PHR**

MSRTRLPSPPAPSPAFSADSFSDLLRQFDPSLFNTSLFDSLPPFGAHTTEAATGEWDEVQSGLRADAPPPT  
 MRVAVTAARPPRAKPAPRRRAAQPSDASPAAQVDLRTLGYSSQQQEKIKPKVRSSTVAQHHEALVGHGFT  
 HAHIVALSQHPAALGTVAVKYQDMIAALPEATHEAIVGVGKQWSGARALEALLTVAGELRGPPLQLDTGQ  
 LLKIAKRGVTAVEAVHAWRNALTGAPLNTPEQVVAIASNNGGKQALETVQRLLPVLCQAHGLTPEQV  
 VAIASHDGGKQALETVQRLLPVLCQAHGLTPEQVVAIASNNGGKQALETVQRLLPVLCQAHGLTPEQVVA  
 IASNNGGKQALETVQRLLPVLCQAHGLTPEQVVAIASNNGGKQALETVQRLLPVLCQAHGLTPEQVVAIAS  
 HDGGKQALETVQRLLPVLCQAHGLTPEQVVAIASNNGGKQALETVQRLLPVLCQAHGLTPEQVVAIASNG  
 GGKQALETVQRLLPVLCQAHGLTPEQVVAIASNNGGKQALETVQRLLPVLCQAHGLTPEQVVAIASNGG  
 KQALETVQRLLPVLCQAHGLTPEQVVAIASNNGGKQALETVQRLLPVLCQAHGLTPEQVVAIASNNGG  
 KQALETVQRLLPVLCQAHGLTPEQVVAIASNNGGKQALETVQRLLPVLCQAHGLTPEQVVAIASNNGGKQA  
 LETVQRLLPVLCQAHGLTPEQVVAIASHDGGRPALESIVAQLSRPDPALAALTNDHLVALACLGGRPALDA  
 VKKGLPHAPALIKRTNRRIPERTSHRVADHAQVVRVLGFFQCHSHPAQAFDDAMTQFGMSRHGLLQLFRR  
 VGVTELEARSGLTLPASQRWDRILQASGMKRAKPSPTSTQTPDQASLHAFADSLERDLTAPSPMHEGDQTR  
 ASASPKKKRKVEASKMDKKTIVWFRDLRIEDNPALAAAHEGSVFPVFIWCPEEEGQFYPRASRWWM  
 KQSLAHLSQLKALGSDLTLIKTHNTISAILDCIRVTGATKVVFNHLYDPVSLVRDHTVKEKLVERGISVQS  
 YNGDLLYEPWEIYCEKGPFTSFNSYWKKCLDMSIESVMLPPPWRMPITAAAEAIWACSIIEELGLENEAE  
 KPSNALLTRAWSPGWSNADKLLNEFIEKQLIDYAKNSKKVVGNSTSLLSPYLHFGEISVRHVFQCARMKQII  
 WARDKNSEGEESADFLRIGLREYSRYICFNFPFTHEQSLLSHLRFPPWDADVDKFKAWRQGRGTGYPLVD  
 AGMRELWATGWMHNRIRVIVSSFAVKFLLLPWKWGMKYFWDTLDDADLECDILGWQYISGSIPDGHELD  
 RLDNPALQGAKYDPEGEYIRQWLPALARLPTIEWIHPWDAPLTVLKASGVELGTNYAKPIVDIDTARELLA  
 KAISRTREAQIMIGAAP

> **HA-NLS-TALE(p11, N136)-SID**

MYPYDVPDYASPKKKRKVEASVDLRTLGYSSQQQEKIKPKVRSSTVAQHHEALVGHGFTHAHIVALSQHP  
 AALGTVAVKYQDMIAALPEATHEAIVGVGKQWSGARALEALLTVAGELRGPPLQLDTGQLLKIAKRGV  
 TAVEAVHAWRNALTGAPLNTPEQVVAIASNNGGKQALETVQRLLPVLCQAHGLTPEQVVAIASHDGGK  
 QALETVQRLLPVLCQAHGLTPEQVVAIASHDGGKQALETVQRLLPVLCQAHGLTPEQVVAIASNNGGKQA  
 LETVQRLLPVLCQAHGLTPEQVVAIASNNGGKQALETVQRLLPVLCQAHGLTPEQVVAIASHDGGKQALET  
 TVQRLLPVLCQAHGLTPEQVVAIASHDGGKQALETVQRLLPVLCQAHGLTPEQVVAIASHDGGKQALETV  
 QRLLPVLCQAHGLTPEQVVAIASNNGGKQALETVQRLLPVLCQAHGLTPEQVVAIASHDGGKQALETVQR  
 LLPVLCQAHGLTPEQVVAIASHDGGKQALETVQRLLPVLCQAHGLTPEQVVAIASNNGGKQALETVQRLLP  
 VLCQAHGLTPEQVVAIASNNGGKQALETVQRLLPVLCQAHGLTPEQVVAIASNNGGKQALETVQRLLPVLC  
 QAHGLTPEQVVAIASHDGGKQALETVQRLLPVLCQAHGLTPEQVVAIASNNGGKQALETVQRLLPVLCQ  
 AHGLTPEQVVAIASHDGGKQALETVQRLLPVLCQAHGLTPEQVVAIASHDGGKQALETVQRLLPVLCQAH  
 GLTPEQVVAIASHDGGRPALESIVAQLSRPDPALAALTNDHLVALACLGGRPALDAVKKGLPHAPALIKRT  
 NRRIPERTSHRVADHAQVVRVLGFFQCHSHPAQAFDDAMTQFGMSRHGLLQLFRRVGVTELEARSGLTLP  
 ASQRWDRILQASGMKRAKPSPTSTQTPDQASLHAFADSLERDLTAPSPMHEGDQTRASASGSMNIQMLL  
 EAADYLERREREAEHGYASMLP.

> **HA-NLS-TALE(p11, N136)-SID4X**

MYPYDVPDYASPKKKRKVEASVDLRTLGYSSQQQEKIKPKVRSSTVAQHHEALVGHGFTHAHIVALSQHP  
 AALGTVAVKYQDMIAALPEATHEAIVGVGKQWSGARALEALLTVAGELRGPPLQLDTGQLLKIAKRGV  
 TAVEAVHAWRNALTGAPLNTPEQVVAIASNNGGKQALETVQRLLPVLCQAHGLTPEQVVAIASHDGGK  
 QALETVQRLLPVLCQAHGLTPEQVVAIASHDGGKQALETVQRLLPVLCQAHGLTPEQVVAIASNNGGKQA  
 LETVQRLLPVLCQAHGLTPEQVVAIASNNGGKQALETVQRLLPVLCQAHGLTPEQVVAIASHDGGKQALET  
 TVQRLLPVLCQAHGLTPEQVVAIASHDGGKQALETVQRLLPVLCQAHGLTPEQVVAIASHDGGKQALETV  
 QRLLPVLCQAHGLTPEQVVAIASNNGGKQALETVQRLLPVLCQAHGLTPEQVVAIASHDGGKQALETVQR



> HA-TALE(*ng2*, C63)-mNES-cib1-mutNLS

YPYDVDPDYASRTRLPSPPAPSPAFSADSFSDLLRQFDPSLFNNTSLFDSLPPFGAHHTEAATGEWDEVQSGLR  
 AADAPPPTMRVAVTAARPPRAKPAPRRRAAQPSDASPAAQVDLRTLGYSSQQQEQEKIKPKVVRSTVAQHHEA  
 LVGHGFTHAHIVALSQHPAALGTVAVKYQDMIAALPEATHEAIVGVGKQWSGARALEALLTVAGELRGPP  
 LQLDTGQLLKIAKRGGVTAVEAVHAWRNALTGAPLNLTPQVVAIASNNGGKQALETVQRLLPVLCQAH  
 GLTPEQVVAIASNNGGKQALETVQRLLPVLCQAHGLTPEQVVAIASNIGGKQALETVQRLLPVLCQAHGLT  
 PEQVVAIASNIGGKQALETVQRLLPVLCQAHGLTPEQVVAIASNNGGKQALETVQRLLPVLCQAHGLTPEQ  
 VVAIASNNGGKQALETVQRLLPVLCQAHGLTPEQVVAIASNIGGKQALETVQRLLPVLCQAHGLTPEQV  
 AIASNNGGKQALETVQRLLPVLCQAHGLTPEQVVAIASNNGGKQALETVQRLLPVLCQAHGLTPEQVVAI  
 ASNIGGKQALETVQRLLPVLCQAHGLTPEQVVAIASNNGGKQALETVQRLLPVLCQAHGLTPEQVVAIASN  
 IGGKQALETVQRLLPVLCQAHGLTPEQVVAIASNIGGKQALETVQRLLPVLCQAHGLTPEQVVAIASNNGG  
 KQALETVQRLLPVLCQAHGLTPEQVVAIASNIGGKQALETVQRLLPVLCQAHGLTPEQVVAIASHDGGRPA  
 LESIVAQLSRPDALAALTDHLLVALACLGGPALDAVKKGLPHAPALIKRTNRRIPERTSHRVAASLQLPP  
 LERLTLNGAIGDLLLLNFPDMSVLERQRAHLKYLNPTFDSPLAGFFADSSMITGGEMDSYLSTAGLNLPM  
 YGETTVEGDSRLSISPETTLGTGNFKAAKFDTEKDCNEAAKKMTMNRDDLVEEGEEEEKSKITEQNNGSTK  
 SIKMKHKAKKEENNFSNDSSKVTKELEKTDYIHVRARRGQATDSHSIAERVRREKISERMKFLQDLVPGC  
 DKITGKAGMLDEIINYVQSLQRQIEFLSMKLAIVNRPDFDMDDIFAKEVASTPMTVVPSPEMVLSGYSHEM  
 VHSGYSSEMVNNGYLHVNPMQVNTSSDPLSCFNNGEAPSMWDSHVQNLNGNLGV

> HA-TALE(*ng2*, C63)-ptk2NES-cib1-mutNLS

YPYDVDPDYASRTRLPSPPAPSPAFSADSFSDLLRQFDPSLFNNTSLFDSLPPFGAHHTEAATGEWDEVQSGLR  
 AADAPPPTMRVAVTAARPPRAKPAPRRRAAQPSDASPAAQVDLRTLGYSSQQQEQEKIKPKVVRSTVAQHHEA  
 LVGHGFTHAHIVALSQHPAALGTVAVKYQDMIAALPEATHEAIVGVGKQWSGARALEALLTVAGELRGPP  
 LQLDTGQLLKIAKRGGVTAVEAVHAWRNALTGAPLNLTPQVVAIASNNGGKQALETVQRLLPVLCQAH  
 GLTPEQVVAIASNNGGKQALETVQRLLPVLCQAHGLTPEQVVAIASNIGGKQALETVQRLLPVLCQAHGLT  
 PEQVVAIASNIGGKQALETVQRLLPVLCQAHGLTPEQVVAIASNNGGKQALETVQRLLPVLCQAHGLTPEQ  
 VVAIASNNGGKQALETVQRLLPVLCQAHGLTPEQVVAIASNIGGKQALETVQRLLPVLCQAHGLTPEQV  
 AIASNNGGKQALETVQRLLPVLCQAHGLTPEQVVAIASNNGGKQALETVQRLLPVLCQAHGLTPEQVVAI  
 ASNIGGKQALETVQRLLPVLCQAHGLTPEQVVAIASNNGGKQALETVQRLLPVLCQAHGLTPEQVVAIASN  
 IGGKQALETVQRLLPVLCQAHGLTPEQVVAIASNIGGKQALETVQRLLPVLCQAHGLTPEQVVAIASNNGG  
 KQALETVQRLLPVLCQAHGLTPEQVVAIASNIGGKQALETVQRLLPVLCQAHGLTPEQVVAIASHDGGRPA  
 LESIVAQLSRPDALAALTDHLLVALACLGGPALDAVKKGLPHAPALIKRTNRRIPERTSHRVAASLDLAS  
 LILNGAIGDLLLLNFPDMSVLERQRAHLKYLNPTFDSPLAGFFADSSMITGGEMDSYLSTAGLNLPMMYGE  
 TVEGDSRLSISPETTLGTGNFKAAKFDTEKDCNEAAKKMTMNRDDLVEEGEEEEKSKITEQNNGSTKSIK  
 KMKHKAKKEENNFSNDSSKVTKELEKTDYIHVRARRGQATDSHSIAERVRREKISERMKFLQDLVPGCDKI  
 TGKAGMLDEIINYVQSLQRQIEFLSMKLAIVNRPDFDMDDIFAKEVASTPMTVVPSPEMVLSGYSHEMVH  
 SGYSSEMVNNGYLHVNPMQVNTSSDPLSCFNNGEAPSMWDSHVQNLNGNLGV

> HA-TALE(*ng2*, C63)-mapkkNES-cib1-mutNLS

YPYDVDPDYASRTRLPSPPAPSPAFSADSFSDLLRQFDPSLFNNTSLFDSLPPFGAHHTEAATGEWDEVQSGLR  
 AADAPPPTMRVAVTAARPPRAKPAPRRRAAQPSDASPAAQVDLRTLGYSSQQQEQEKIKPKVVRSTVAQHHEA  
 LVGHGFTHAHIVALSQHPAALGTVAVKYQDMIAALPEATHEAIVGVGKQWSGARALEALLTVAGELRGPP  
 LQLDTGQLLKIAKRGGVTAVEAVHAWRNALTGAPLNLTPQVVAIASNNGGKQALETVQRLLPVLCQAH  
 GLTPEQVVAIASNNGGKQALETVQRLLPVLCQAHGLTPEQVVAIASNIGGKQALETVQRLLPVLCQAHGLT  
 PEQVVAIASNIGGKQALETVQRLLPVLCQAHGLTPEQVVAIASNNGGKQALETVQRLLPVLCQAHGLTPEQ  
 VVAIASNNGGKQALETVQRLLPVLCQAHGLTPEQVVAIASNIGGKQALETVQRLLPVLCQAHGLTPEQV  
 AIASNNGGKQALETVQRLLPVLCQAHGLTPEQVVAIASNNGGKQALETVQRLLPVLCQAHGLTPEQVVAI  
 ASNIGGKQALETVQRLLPVLCQAHGLTPEQVVAIASNNGGKQALETVQRLLPVLCQAHGLTPEQVVAI

ASNIGGKQALETVQRLLPVLCQAHGLTPEQVVAIASNNGGKQALETVQRLLPVLCQAHGLTPEQVVAIASN  
 IGGKQALETVQRLLPVLCQAHGLTPEQVVAIASNIGGKQALETVQRLLPVLCQAHGLTPEQVVAIASNNGG  
 KQALETVQRLLPVLCQAHGLTPEQVVAIASNIGGKQALETVQRLLPVLCQAHGLTPEQVVAIASHDGGRPA  
 LESIVAQLSRPDPALAALTNDHLVALACLGGPALDAVKKGLPHAPALIKRTNRRIPERTSHRVAASLQKK  
 LEELELNGAIGDLLLLNFPDMSVLERQRAHLKYLNPTFDSPLAGFFADSSMITGGEMDSYLSTAGLNLPM  
 YGETTVEGDSRLSISPETTLGTGNFKAAKFDTETKDCNEAAKKMTMNRDDLVEEGEEEEKSKITEQNNGSTK  
 SIKKMKHKAKKEENNFSNDSSKVTKELEKTDYIHVRARRGQATDSHSIAERVRRERKISERMKFLQDLVPGC  
 DKITGKAGMLDEIINYVQSLQRQIEFLSMKLAIVNPRPDFDMDDIFAKEVASTPMTVVPSPPEMVLVSGYSHEM  
 VHSGYSSEMVNNGYLHVNPMPQVNTSSDPLSCFNNGEAPSMWDSHVQNLVGNLGV

> **HA-TALE(*ng2*, C63)-GS-cib1A3-mutNLS**

YPYDVPDYASRTRLSPSPAPSPAFSADSFSDLLRQFDPSLNTSLFDSLPPFGAHHTEAATGEWDEVQSGLR  
 AADAPPPTMRVAVTAARPPRAKPAPRRRAAQPSDASPAAQVDLRTLGYSSQQQEKIKPKVRSTVAQHHEA  
 LVGHGFTHAHIVALSQHPAALGTVAVKYQDMIAALPEATHEAIVGVGKQWSGARALEALLTVAGELRGPP  
 LQLDTGQLLKIARKGGVTAVEAVHAWRNALTGAPLNLTPEQVVAIASNNGGKQALETVQRLLPVLCQAH  
 GLTPEQVVAIASNNGGKQALETVQRLLPVLCQAHGLTPEQVVAIASNIGGKQALETVQRLLPVLCQAHGLT  
 PEQVVAIASNIGGKQALETVQRLLPVLCQAHGLTPEQVVAIASNNGGKQALETVQRLLPVLCQAHGLTPEQ  
 VVAIASNNGGKQALETVQRLLPVLCQAHGLTPEQVVAIASNIGGKQALETVQRLLPVLCQAHGLTPEQV  
 VVAIASNNGGKQALETVQRLLPVLCQAHGLTPEQVVAIASNNGGKQALETVQRLLPVLCQAHGLTPEQVVAI  
 ASNIGGKQALETVQRLLPVLCQAHGLTPEQVVAIASNNGGKQALETVQRLLPVLCQAHGLTPEQVVAIASN  
 IGGKQALETVQRLLPVLCQAHGLTPEQVVAIASNIGGKQALETVQRLLPVLCQAHGLTPEQVVAIASNNGG  
 KQALETVQRLLPVLCQAHGLTPEQVVAIASNIGGKQALETVQRLLPVLCQAHGLTPEQVVAIASHDGGRPA  
 LESIVAQLSRPDPALAALTNDHLVALACLGGPALDAVKKGLPHAPALIKRTNRRIPERTSHRVAASGGGG  
 SGGGNSGAIGDLLLLNFPDMSVLERQRAHLKYLNPTFDSPLAGFFADSSMITGGEMDSYLSTAGLNLPM  
 MYGETTVEGDSRLSISPETTLGTGNFKAAKFDTETKDCNEAAKKMTMNRDDLVEEGEEEEKSKITEQNNGS  
 TKSIIKMKHKAKKEENNFSNDSSKVTKELEKTDYIHVRARRGQATDSHSIAERVRRERKISERMKFLQDLVP  
 GCDKITGKAGMLDEIINYVQSLQRQIEFLSMKLAIVNPRPDFDMDDIFAKEVASTPMTVVPSPPEMVLVSGYSH  
 EMVHSGYSSEMVNNGYLHVNPMPQVNTSS

> **HA-TALE(*ng2*, C63)-wNLS-cib1A3-mutNLS**

YPYDVPDYASRTRLSPSPAPSPAFSADSFSDLLRQFDPSLNTSLFDSLPPFGAHHTEAATGEWDEVQSGLR  
 AADAPPPTMRVAVTAARPPRAKPAPRRRAAQPSDASPAAQVDLRTLGYSSQQQEKIKPKVRSTVAQHHEA  
 LVGHGFTHAHIVALSQHPAALGTVAVKYQDMIAALPEATHEAIVGVGKQWSGARALEALLTVAGELRGPP  
 LQLDTGQLLKIARKGGVTAVEAVHAWRNALTGAPLNLTPEQVVAIASNNGGKQALETVQRLLPVLCQAH  
 GLTPEQVVAIASNNGGKQALETVQRLLPVLCQAHGLTPEQVVAIASNIGGKQALETVQRLLPVLCQAHGLT  
 PEQVVAIASNIGGKQALETVQRLLPVLCQAHGLTPEQVVAIASNNGGKQALETVQRLLPVLCQAHGLTPEQ  
 VVAIASNNGGKQALETVQRLLPVLCQAHGLTPEQVVAIASNIGGKQALETVQRLLPVLCQAHGLTPEQV  
 VVAIASNNGGKQALETVQRLLPVLCQAHGLTPEQVVAIASNNGGKQALETVQRLLPVLCQAHGLTPEQVVAI  
 ASNIGGKQALETVQRLLPVLCQAHGLTPEQVVAIASNNGGKQALETVQRLLPVLCQAHGLTPEQVVAIASN  
 IGGKQALETVQRLLPVLCQAHGLTPEQVVAIASNIGGKQALETVQRLLPVLCQAHGLTPEQVVAIASNNGG  
 KQALETVQRLLPVLCQAHGLTPEQVVAIASNIGGKQALETVQRLLPVLCQAHGLTPEQVVAIASHDGGRPA  
 LESIVAQLSRPDPALAALTNDHLVALACLGGPALDAVKKGLPHAPALIKRTNRRIPERTSHRVAASLYPER  
 LRRILNNGAIGDLLLLNFPDMSVLERQRAHLKYLNPTFDSPLAGFFADSSMITGGEMDSYLSTAGLNLPM  
 YGETTVEGDSRLSISPETTLGTGNFKAAKFDTETKDCNEAAKKMTMNRDDLVEEGEEEEKSKITEQNNGSTK  
 SIKKMKHKAKKEENNFSNDSSKVTKELEKTDYIHVRARRGQATDSHSIAERVRRERKISERMKFLQDLVPGC  
 DKITGKAGMLDEIINYVQSLQRQIEFLSMKLAIVNPRPDFDMDDIFAKEVASTPMTVVPSPPEMVLVSGYSHEM  
 VHSGYSSEMVNNGYLHVNPMPQVNTSS

**> HA-TALE(*ng2*, C63)-mNLS-cib1Δ3-mutNLS**

YPYDVDPDYASRTRLPSPPAPSPAFSADSFSDLLRQFDPSLFNTSLFDSLPPFGAHHTEAATGEWDEVQSGLR  
 AADAPPPTMRVAVTAARPPRAKPAPRRRAAQPSDASPAAQVDLRTLGYSSQQQEKIKPKVRSTVAQHHEA  
 LVGHGFTHAHIVALSQHPAALGTVAVKYQDMIAALPEATHEAIVGVGKQWSGARALEALLTVAGELRGPP  
 LQLDTGQLLKIAKRGGVTAVEAVHAWRNALTGAPLNLTPQVVAIASNNGGKQALETVQRLLPVLCQAH  
 GLTPEQVVAIASNNGGKQALETVQRLLPVLCQAHGLTPEQVVAIASNIGGKQALETVQRLLPVLCQAHGLT  
 PEQVVAIASNIGGKQALETVQRLLPVLCQAHGLTPEQVVAIASNNGGKQALETVQRLLPVLCQAHGLTPEQ  
 VVAIASNNGGKQALETVQRLLPVLCQAHGLTPEQVVAIASNIGGKQALETVQRLLPVLCQAHGLTPEQV  
 AIASNNGGKQALETVQRLLPVLCQAHGLTPEQVVAIASNNGGKQALETVQRLLPVLCQAHGLTPEQVVAI  
 ASNIGGKQALETVQRLLPVLCQAHGLTPEQVVAIASNNGGKQALETVQRLLPVLCQAHGLTPEQVVAIASN  
 IGGKQALETVQRLLPVLCQAHGLTPEQVVAIASNIGGKQALETVQRLLPVLCQAHGLTPEQVVAIASNNGG  
 KQALETVQRLLPVLCQAHGLTPEQVVAIASNIGGKQALETVQRLLPVLCQAHGLTPEQVVAIASHDGGRPA  
 LESIVAQLSRPDPALAALTDHLLVALACLGGPALDAVKKGLPHAPALIKRTNRRIPERTSHRVAASSPKKK  
 RKVEASNGAIGDLLLLNFPDMSVLERQRAHLKYLNPTFDSPLAGFFADSSMITGGEMDSYLSTAGLNLPM  
 MYGETTVEGDSRLSISPETTLGTGNFKAAKFDTEKDCNEAAKKMTMNRDDLVEEGEEESKITEQNNGS  
 TSIKMKKHKAKKEENNFSNDSKVTKELEKTDYIHVRARRGQATDSHSIAERVRREKISERMKFLQDLVP  
 GCDKITGKAGMLDEIINYVQSLQRQIEFLSMKLAIVNPRPDFMDDIFAKEVASTPMTVVPSPPEMVLVSGYSH  
 EMVHSGYSSEMVSNGYLHVNPMQVNTSS

**> HA-TALE(*ng2*, C63)-GS-cib1-mutNLS-mutbHLH**

YPYDVDPDYASRTRLPSPPAPSPAFSADSFSDLLRQFDPSLFNTSLFDSLPPFGAHHTEAATGEWDEVQSGLR  
 AADAPPPTMRVAVTAARPPRAKPAPRRRAAQPSDASPAAQVDLRTLGYSSQQQEKIKPKVRSTVAQHHEA  
 LVGHGFTHAHIVALSQHPAALGTVAVKYQDMIAALPEATHEAIVGVGKQWSGARALEALLTVAGELRGPP  
 LQLDTGQLLKIAKRGGVTAVEAVHAWRNALTGAPLNLTPQVVAIASNNGGKQALETVQRLLPVLCQAH  
 GLTPEQVVAIASNNGGKQALETVQRLLPVLCQAHGLTPEQVVAIASNIGGKQALETVQRLLPVLCQAHGLT  
 PEQVVAIASNIGGKQALETVQRLLPVLCQAHGLTPEQVVAIASNNGGKQALETVQRLLPVLCQAHGLTPEQ  
 VVAIASNNGGKQALETVQRLLPVLCQAHGLTPEQVVAIASNIGGKQALETVQRLLPVLCQAHGLTPEQV  
 AIASNNGGKQALETVQRLLPVLCQAHGLTPEQVVAIASNNGGKQALETVQRLLPVLCQAHGLTPEQVVAI  
 ASNIGGKQALETVQRLLPVLCQAHGLTPEQVVAIASNNGGKQALETVQRLLPVLCQAHGLTPEQVVAIASN  
 IGGKQALETVQRLLPVLCQAHGLTPEQVVAIASNIGGKQALETVQRLLPVLCQAHGLTPEQVVAIASNNGG  
 KQALETVQRLLPVLCQAHGLTPEQVVAIASNIGGKQALETVQRLLPVLCQAHGLTPEQVVAIASHDGGRPA  
 LESIVAQLSRPDPALAALTDHLLVALACLGGPALDAVKKGLPHAPALIKRTNRRIPERTSHRVAASGGGG  
 SGGGGSNGAIGDLLLLNFPDMSVLERQRAHLKYLNPTFDSPLAGFFADSSMITGGEMDSYLSTAGLNLPM  
 MYGETTVEGDSRLSISPETTLGTGNFKAAKFDTEKDCNEAAKKMTMNRDDLVEEGEEESKITEQNNGS  
 TSIKMKKHKAKKEENNFSNDSKVTKELEKTDYIHVRARAQAATDSHSIAEAVAREKISERMKFLQDLVP  
 GCDKITGKAGMLDEIINYVQSLQRQIEFLSMKLAIVNPRPDFMDDIFAKEVASTPMTVVPSPPEMVLVSGYSH  
 EMVHSGYSSEMVSNGYLHVNPMQVNTSSDPLSCFNNGEAPSMWDSHVQNLVGNLGV

**> HA-TALE(*ng2*, C63)-wNES-cib1-mutNLS-mutbHLH**

SRTRLPSPPAPSPAFSADSFSDLLRQFDPSLFNTSLFDSLPPFGAHHTEAATGEWDEVQSGLRAADAPPPTMR  
 VAVTAARPPRAKPAPRRRAAQPSDASPAAQVDLRTLGYSSQQQEKIKPKVRSTVAQHHEALVGHGFTHAH  
 IVALSQHPAALGTVAVKYQDMIAALPEATHEAIVGVGKQWSGARALEALLTVAGELRGPPPLQLDTGQLLK  
 IAKRGGVTAVEAVHAWRNALTGAPLNLTPQVVAIASNNGGKQALETVQRLLPVLCQAHGLTPEQVVAIA  
 SNNGGKQALETVQRLLPVLCQAHGLTPEQVVAIASNIGGKQALETVQRLLPVLCQAHGLTPEQVVAIASNI  
 GGKQALETVQRLLPVLCQAHGLTPEQVVAIASNNGGKQALETVQRLLPVLCQAHGLTPEQVVAIASNNGG  
 KQALETVQRLLPVLCQAHGLTPEQVVAIASNIGGKQALETVQRLLPVLCQAHGLTPEQVVAIASNNGGKQ  
 ALETQRLLPVLCQAHGLTPEQVVAIASNNGGKQALETVQRLLPVLCQAHGLTPEQVVAIASNIGGKQALE

TVQRLLPVLCQAHGLTPEQVVAIASNNGGKQALETVQRLLPVLCQAHGLTPEQVVAIASNIGGKQALETVQ  
 RLLPVLCQAHGLTPEQVVAIASNIGGKQALETVQRLLPVLCQAHGLTPEQVVAIASNNGGKQALETVQRL  
 PVLCQAHGLTPEQVVAIASNIGGKQALETVQRLLPVLCQAHGLTPEQVVAIASHDGGRPALESIVAQLSRPD  
 PALAALTNDDLVALACLGGPALDAVKKGLPHAPALIKRTNRRIPERTSHRVAASLYPERLRRILTNGAIGG  
 DILLNFPDMSVLERQRAHLKYLNPTFDSPLAGFFADSSMITGGEMDSYLSTAGLNLPMMYGETTVEGDSR  
 LSISPETTLGTGNFKAAKFDTEKDCNEAAKKMTMNRDDLVEEGEEKSKITEQNNGSTKSIKKMKHKAK  
 KEENNFSNDSSKVTKELEKTDYIHVRARAQAATDSHSIAEAVAREKISERMKFLQDLVPGCDKITGKAGML  
 DEIINYVQSLQRQIEFLSMKLAIVNPRPDFDMDIFAKEVASTPMTVVPPEMVLVSGYSHEMVHSGYSSEM  
 VNSGYLHVNPMQQVNTSSDPLSCFNNGEAPSMWDSHVQNLVGNLGV

> **HA-TALE(*ng2*, C63)-GS-cib1A1-mutNLS**

YPYDVPDYASRTRLSPSPAPSPAFSADSFSDLLRQFDPFSLFNTSLFDSLPPFGAHTTEAATGEWDEVQSGLR  
 AADAPPPTMRVAVTAARPPRAKPAPRRRAAQPSDASPAAQVDLRTLGYSSQQQEKIKPKVRSTVAQHHEA  
 LVGHGFTHAHIVALSQHPAALGTVAVKYQDMIAALPEATHEAIVGVGKQWSGARALEALLTVAGELRGPP  
 LQLDTGQLLKIARKGGVTAVEAVHAWRNALTGAPLNLTPEQVVAIASNNGGKQALETVQRLLPVLCQAH  
 GLTPEQVVAIASNNGGKQALETVQRLLPVLCQAHGLTPEQVVAIASNIGGKQALETVQRLLPVLCQAHGLT  
 PEQVVAIASNIGGKQALETVQRLLPVLCQAHGLTPEQVVAIASNNGGKQALETVQRLLPVLCQAHGLTPEQ  
 VVAIASNNGGKQALETVQRLLPVLCQAHGLTPEQVVAIASNIGGKQALETVQRLLPVLCQAHGLTPEQV  
 VVAIASNNGGKQALETVQRLLPVLCQAHGLTPEQVVAIASNNGGKQALETVQRLLPVLCQAHGLTPEQVVAI  
 ASNIGGKQALETVQRLLPVLCQAHGLTPEQVVAIASNNGGKQALETVQRLLPVLCQAHGLTPEQVVAIASN  
 IGGKQALETVQRLLPVLCQAHGLTPEQVVAIASNIGGKQALETVQRLLPVLCQAHGLTPEQVVAIASNNGG  
 KQALETVQRLLPVLCQAHGLTPEQVVAIASNIGGKQALETVQRLLPVLCQAHGLTPEQVVAIASHDGGRPA  
 LESIVAQLSRPDPALAALTNDDLVALACLGGPALDAVKKGLPHAPALIKRTNRRIPERTSHRVAASGGGG  
 SGGGNSGAIGGDILLNFPDMSVLERQRAHLKYLNPTFDSPLAGFFADSSMITGGEMDSYLSTAGLNLPM  
 MYGETTVEGDSRSLISPETTLGTGNFKAAKFDTEKDCNEAAKKMTMNRDDLVEEGEEKSKITEQNNGS  
 TSIKKMKHKAKKEENNFSNDSSKVTKELEKTDYIHVRARRGQATDSHSIAERVRREKISERMKFLQDLV  
 PGCDKITGKAGMLDEIINYVQSLQRGGSVASTPMTVVPPEMVLVSGYSHEMVHSGYSSEMNVNSGYLHVNPM  
 QQVNTSSDPLSCFNNGEAPSMWDSHVQNLVGNLGV

> **HA-TALE(*ng2*, C63)-wNLS-cib1A1-mutNLS**

YPYDVPDYASRTRLSPSPAPSPAFSADSFSDLLRQFDPFSLFNTSLFDSLPPFGAHTTEAATGEWDEVQSGLR  
 AADAPPPTMRVAVTAARPPRAKPAPRRRAAQPSDASPAAQVDLRTLGYSSQQQEKIKPKVRSTVAQHHEA  
 LVGHGFTHAHIVALSQHPAALGTVAVKYQDMIAALPEATHEAIVGVGKQWSGARALEALLTVAGELRGPP  
 LQLDTGQLLKIARKGGVTAVEAVHAWRNALTGAPLNLTPEQVVAIASNNGGKQALETVQRLLPVLCQAH  
 GLTPEQVVAIASNNGGKQALETVQRLLPVLCQAHGLTPEQVVAIASNIGGKQALETVQRLLPVLCQAHGLT  
 PEQVVAIASNIGGKQALETVQRLLPVLCQAHGLTPEQVVAIASNNGGKQALETVQRLLPVLCQAHGLTPEQ  
 VVAIASNNGGKQALETVQRLLPVLCQAHGLTPEQVVAIASNIGGKQALETVQRLLPVLCQAHGLTPEQV  
 VVAIASNNGGKQALETVQRLLPVLCQAHGLTPEQVVAIASNNGGKQALETVQRLLPVLCQAHGLTPEQVVAI  
 ASNIGGKQALETVQRLLPVLCQAHGLTPEQVVAIASNNGGKQALETVQRLLPVLCQAHGLTPEQVVAIASN  
 IGGKQALETVQRLLPVLCQAHGLTPEQVVAIASNIGGKQALETVQRLLPVLCQAHGLTPEQVVAIASNNGG  
 KQALETVQRLLPVLCQAHGLTPEQVVAIASNIGGKQALETVQRLLPVLCQAHGLTPEQVVAIASHDGGRPA  
 LESIVAQLSRPDPALAALTNDDLVALACLGGPALDAVKKGLPHAPALIKRTNRRIPERTSHRVAASLYPER  
 LRRILTNGAIGGDILLNFPDMSVLERQRAHLKYLNPTFDSPLAGFFADSSMITGGEMDSYLSTAGLNLPM  
 YGETTVEGDSRSLISPETTLGTGNFKAAKFDTEKDCNEAAKKMTMNRDDLVEEGEEKSKITEQNNGSTK  
 SIKKMKHKAKKEENNFSNDSSKVTKELEKTDYIHVRARRGQATDSHSIAERVRREKISERMKFLQDLVPG  
 CDKITGKAGMLDEIINYVQSLQRGGSGEEKSKITEQNNGSTKSIKKMKHKAKKEENNFSNDSSKVTKELEK  
 TDYIHVRARRGQATDSHSIAERVRREKISERMKFLQDLVPGCDKITGKAGMLDEIINYVQSLQRGGSVASTP



MTVVPSPEMVLVSGYSHEMVHSGYSSEMVNNGYLHVNPMQQVNTSSDPLSCFNNGEAPSMWDSHVQNLV  
GNLGV

> **HA-TALE(*ng2*, C63)-GS-cib1Δ2-mutNLS**

YPYDVPDYASRTRLPSPPAPSPAFSADSFSDLLRQFDPSLNTSLFDSLPPFGAHHTEAATGEWDEVQSGLR  
AADAPPPTMRVAVTAARPPRAKPAPRRRAAQPSDASPAAQVDLRTLGYSSQQQEKIKPKVVRSTVAQHHEA  
LVGHGFTHAHIVALSQHPAALGTVAVKYQDMIAALPEATHEAIVGVGKQWSGARALEALLTVAGELRGPP  
LQLDTGQLLKIARKGGVTAVEAVHAWRNALTGAPLNLTPEQVVAIASNNGGKQALETVQRLLPVLCQAH  
GLTPEQVVAIASNNGGKQALETVQRLLPVLCQAHGLTPEQVVAIASNIGGKQALETVQRLLPVLCQAHGLT  
PEQVVAIASNIGGKQALETVQRLLPVLCQAHGLTPEQVVAIASNNGGKQALETVQRLLPVLCQAHGLTPEQ  
VVAIASNNGGKQALETVQRLLPVLCQAHGLTPEQVVAIASNIGGKQALETVQRLLPVLCQAHGLTPEQV  
VAIASNNGGKQALETVQRLLPVLCQAHGLTPEQVVAIASNNGGKQALETVQRLLPVLCQAHGLTPEQVVAI  
ASNIGGKQALETVQRLLPVLCQAHGLTPEQVVAIASNNGGKQALETVQRLLPVLCQAHGLTPEQVVAIASN  
IGGKQALETVQRLLPVLCQAHGLTPEQVVAIASNIGGKQALETVQRLLPVLCQAHGLTPEQVVAIASNNGG  
KQALETVQRLLPVLCQAHGLTPEQVVAIASNIGGKQALETVQRLLPVLCQAHGLTPEQVVAIASHDGGRPA  
LESIVAQLSRPDALAALTDHDLVALACLGGPALDAVKKGLPHAPALIKRTNRRIPERTSHRVAASGGGG  
SGGGGSNGAIGDLLLLNFPDMSVLERQRAHLKYLNPTFDSPLAGFFADSSMITGGEMDSYLSTAGLNLP  
MYGETTVEGDSRLSISPETTLGTGNFKA AKFDTETKDCNEAAKKMTMNRDDLVEEGEEEEKSKITEQNNGS  
TKSIKMKHKAKKEENNFSNDSKVTKELEKTDYIHVRARRGQATDSHSIAERVRREKISERMKFLQDLVP  
GCDKITGKAGMLDEIINYVQSLQRQIEFLSMKLAIVNPRPDFDMDDIFAKEVASTPMTVVPSPEMVLVSGY  
GSPVSCFNNGEAPSMWDSHVQNLVGNLGV

> **HA-TALE(*ng2*, C63)-wNES-cib1Δ2-mutNLS**

YPYDVPDYASRTRLPSPPAPSPAFSADSFSDLLRQFDPSLNTSLFDSLPPFGAHHTEAATGEWDEVQSGLR  
AADAPPPTMRVAVTAARPPRAKPAPRRRAAQPSDASPAAQVDLRTLGYSSQQQEKIKPKVVRSTVAQHHEA  
LVGHGFTHAHIVALSQHPAALGTVAVKYQDMIAALPEATHEAIVGVGKQWSGARALEALLTVAGELRGPP  
LQLDTGQLLKIARKGGVTAVEAVHAWRNALTGAPLNLTPEQVVAIASNNGGKQALETVQRLLPVLCQAH  
GLTPEQVVAIASNNGGKQALETVQRLLPVLCQAHGLTPEQVVAIASNIGGKQALETVQRLLPVLCQAHGLT  
PEQVVAIASNIGGKQALETVQRLLPVLCQAHGLTPEQVVAIASNNGGKQALETVQRLLPVLCQAHGLTPEQ  
VVAIASNNGGKQALETVQRLLPVLCQAHGLTPEQVVAIASNIGGKQALETVQRLLPVLCQAHGLTPEQV  
VAIASNNGGKQALETVQRLLPVLCQAHGLTPEQVVAIASNIGGKQALETVQRLLPVLCQAHGLTPEQV  
VAIASNNGGKQALETVQRLLPVLCQAHGLTPEQVVAIASNNGGKQALETVQRLLPVLCQAHGLTPEQVVAI  
ASNIGGKQALETVQRLLPVLCQAHGLTPEQVVAIASNNGGKQALETVQRLLPVLCQAHGLTPEQVVAIASN  
IGGKQALETVQRLLPVLCQAHGLTPEQVVAIASNIGGKQALETVQRLLPVLCQAHGLTPEQVVAIASNNGG  
KQALETVQRLLPVLCQAHGLTPEQVVAIASNIGGKQALETVQRLLPVLCQAHGLTPEQVVAIASHDGGRPA  
LESIVAQLSRPDALAALTDHDLVALACLGGPALDAVKKGLPHAPALIKRTNRRIPERTSHRVAASLYPER  
LRRILTNGAIGDLLLLNFPDMSVLERQRAHLKYLNPTFDSPLAGFFADSSMITGGEMDSYLSTAGLNLPMM  
YGETTVEGDSRLSISPETTLGTGNFKA AKFDTETKDCNEAAKKMTMNRDDLVEEGEEEEKSKITEQNNGSTK  
SIKMKHKAKKEENNFSNDSKVTKELEKTDYIHVRARRGQATDSHSIAERVRREKISERMKFLQDLVPGC  
DKITGKAGMLDEIINYVQSLQRQIEFLSMKLAIVNPRPDFDMDDIFAKEVASTPMTVVPSPEMVLVSGYGGSP  
LSCFNNGEAPSMWDSHVQNLVGNLGV

> **HA-TALE(*ng2*, C63)-NLS-cib1-mutNLS-mutbHLH**

YPYDVPDYASRTRLPSPPAPSPAFSADSFSDLLRQFDPSLNTSLFDSLPPFGAHHTEAATGEWDEVQSGLR  
AADAPPPTMRVAVTAARPPRAKPAPRRRAAQPSDASPAAQVDLRTLGYSSQQQEKIKPKVVRSTVAQHHEA  
LVGHGFTHAHIVALSQHPAALGTVAVKYQDMIAALPEATHEAIVGVGKQWSGARALEALLTVAGELRGPP  
LQLDTGQLLKIARKGGVTAVEAVHAWRNALTGAPLNLTPEQVVAIASNNGGKQALETVQRLLPVLCQAH  
GLTPEQVVAIASNNGGKQALETVQRLLPVLCQAHGLTPEQVVAIASNIGGKQALETVQRLLPVLCQAHGLT

PEQVVAIASNIGGKQALETQVRLLPVLCQAHGLTPEQVVAIASNNGGKQALETQVRLLPVLCQAHGLTPEQ  
 VVAIASNNGGKQALETQVRLLPVLCQAHGLTPEQVVAIASNIGGKQALETQVRLLPVLCQAHGLTPEQV  
 AIASNNGGKQALETQVRLLPVLCQAHGLTPEQVVAIASNNGGKQALETQVRLLPVLCQAHGLTPEQVVAI  
 ASNIGGKQALETQVRLLPVLCQAHGLTPEQVVAIASNNGGKQALETQVRLLPVLCQAHGLTPEQVVAIASN  
 IGGKQALETQVRLLPVLCQAHGLTPEQVVAIASNIGGKQALETQVRLLPVLCQAHGLTPEQVVAIASNNGG  
 KQALETQVRLLPVLCQAHGLTPEQVVAIASNIGGKQALETQVRLLPVLCQAHGLTPEQVVAIASHDGGRPA  
 LESIVAQLSRPDPALAALTDHDLVALACLGGPDAVKKGLPHAPALIKRTNRRIPERTSHRVAASSPKKK  
 RKVEASNGAIGDLLLLNFPDMSVLERQRAHLKYLNPTFDSPLAGFFADSSMITGGEMDSYLSTAGLNLPM  
 MYGETTVEGDSRLSISPETTLGTGNFKA AKFDTETKDCNEAAKKMTMNRDDLVEEGEEESKITEQNNGS  
 TKSIIKMKHKAKKEENNFSNDSKVTKELEKTDYIHVRARAAQATDSHSIAEAVAREKISERMKFLQDLVP  
 GCDKITGKAGMLDEIINYVQSLQRQIEFLSMKLAIVNRPDFDMDIFAKEVASTPMTVVPSPPEMVLVSGYSH  
 EMVHSGYSSEMVSNGYLHVNPQQVNTSSDPLSCFNNGEAPSMWDSHVQNLVGNLGV

> HA-TALE(*ng2*, C63)-NLS-cib1A1-mutNLS

YPYDVPDYASRTRLPSPPAPSPAFSADSFSDLLRQFDPSLFNTSLFDSLPPFGAHHTEAATGEWDEVQSGLR  
 AADAPPPTMRVAVTAARPPRAKPAPRRRAAQPSDASPAAQVDLRTLGYSSQQQEKIKPKVVRSTVAQHHEA  
 LVGHGFTHAHIVALSQHPAALGTVAVKYQDMIAALPEATHEAIVGVGKQWSGARALEALLTVAGELRGPP  
 LQLDTGQLLKIARKGGVTAVEAVHAWRNALTGAPLNLTPEQVVAIASNNGGKQALETQVRLLPVLCQAH  
 GLTPEQVVAIASNNGGKQALETQVRLLPVLCQAHGLTPEQVVAIASNIGGKQALETQVRLLPVLCQAHGLT  
 PEQVVAIASNIGGKQALETQVRLLPVLCQAHGLTPEQVVAIASNNGGKQALETQVRLLPVLCQAHGLTPEQ  
 VVAIASNNGGKQALETQVRLLPVLCQAHGLTPEQVVAIASNIGGKQALETQVRLLPVLCQAHGLTPEQV  
 AIASNNGGKQALETQVRLLPVLCQAHGLTPEQVVAIASNNGGKQALETQVRLLPVLCQAHGLTPEQVVAI  
 ASNIGGKQALETQVRLLPVLCQAHGLTPEQVVAIASNNGGKQALETQVRLLPVLCQAHGLTPEQVVAIASN  
 IGGKQALETQVRLLPVLCQAHGLTPEQVVAIASNIGGKQALETQVRLLPVLCQAHGLTPEQVVAIASNNGG  
 KQALETQVRLLPVLCQAHGLTPEQVVAIASNIGGKQALETQVRLLPVLCQAHGLTPEQVVAIASHDGGRPA  
 LESIVAQLSRPDPALAALTDHDLVALACLGGPDAVKKGLPHAPALIKRTNRRIPERTSHRVAASSPKKK  
 RKVEASNGAIGDLLLLNFPDMSVLERQRAHLKYLNPTFDSPLAGFFADSSMITGGEMDSYLSTAGLNLPM  
 MYGETTVEGDSRLSISPETTLGTGNFKA AKFDTETKDCNEAAKKMTMNRDDLVEEGEEESKITEQNNGS  
 TKSIIKMKHKAKKEENNFSNDSKVTKELEKTDYIHVRARRGQATDSHSIAERVRREKISERMKFLQDLVP  
 GCDKITGKAGMLDEIINYVQSLQRGGSVASTPMTVVPSPPEMVLVSGYSHMVSSEMVSNGYLHVNP  
 QQVNTSSDPLSCFNNGEAPSMWDSHVQNLVGNLGV

> HA-TALE(*ng2*, C63)-NLS-cib1A2-mutNLS

YPYDVPDYASRTRLPSPPAPSPAFSADSFSDLLRQFDPSLFNTSLFDSLPPFGAHHTEAATGEWDEVQSGLR  
 AADAPPPTMRVAVTAARPPRAKPAPRRRAAQPSDASPAAQVDLRTLGYSSQQQEKIKPKVVRSTVAQHHEA  
 LVGHGFTHAHIVALSQHPAALGTVAVKYQDMIAALPEATHEAIVGVGKQWSGARALEALLTVAGELRGPP  
 LQLDTGQLLKIARKGGVTAVEAVHAWRNALTGAPLNLTPEQVVAIASNNGGKQALETQVRLLPVLCQAH  
 GLTPEQVVAIASNNGGKQALETQVRLLPVLCQAHGLTPEQVVAIASNIGGKQALETQVRLLPVLCQAHGLT  
 PEQVVAIASNIGGKQALETQVRLLPVLCQAHGLTPEQVVAIASNNGGKQALETQVRLLPVLCQAHGLTPEQ  
 VVAIASNNGGKQALETQVRLLPVLCQAHGLTPEQVVAIASNIGGKQALETQVRLLPVLCQAHGLTPEQV  
 AIASNNGGKQALETQVRLLPVLCQAHGLTPEQVVAIASNNGGKQALETQVRLLPVLCQAHGLTPEQVVAI  
 ASNIGGKQALETQVRLLPVLCQAHGLTPEQVVAIASNNGGKQALETQVRLLPVLCQAHGLTPEQVVAIASN  
 IGGKQALETQVRLLPVLCQAHGLTPEQVVAIASNIGGKQALETQVRLLPVLCQAHGLTPEQVVAIASNNGG  
 KQALETQVRLLPVLCQAHGLTPEQVVAIASNIGGKQALETQVRLLPVLCQAHGLTPEQVVAIASHDGGRPA  
 LESIVAQLSRPDPALAALTDHDLVALACLGGPDAVKKGLPHAPALIKRTNRRIPERTSHRVAASLYPER  
 LRRILNNGAIGDLLLLNFPDMSVLERQRAHLKYLNPTFDSPLAGFFADSSMITGGEMDSYLSTAGLNLPM  
 YGETTVEGDSRLSISPETTLGTGNFKA AKFDTETKDCNEAAKKMTMNRDDLVEEGEEESKITEQNNGSTK  
 SIKKMKHKAKKEENNFSNDSKVTKELEKTDYIHVRARRGQATDSHSIAERVRREKISERMKFLQDLVPGC

DKITGKAGMLDEIINYVQSLQRQIEFLSMKLAIVNPRPDFMDDIFAKEVASTPMTVVPSPEMVLSGYGGSP  
LSCFNNGEAPSMWDSHVQNLYGNLGV

> HA-TALE(*ng2*, C63)-GS-iNES1-cib1-mutNLS

YPYDVPDYASRTRLPSPPAPSPAFSADSFSDLLRQFDPSLFNTSLFDSLPPFGAHHTEAATGEWDEVQSGLR  
AADAPPPTMRVAVTAARPPRAKPAPRRRAAQPSDASPAAQVDLRTLGYSSQQQEQEKIKPKVVRSTVAQHHEA  
LVGHGFTHAHIVALSQHPAALGTVAVKYQDMIAALPEATHEAIVGVGKQWSGARALEALLTVAGELRGP  
LQLDTGQLLKIARKGGVTAVEAVHAWRNALTGAPLNLTPEQVVAIASNNGGKQALETVQRLLPVLCQAH  
GLTPEQVVAIASNNGGKQALETVQRLLPVLCQAHGLTPEQVVAIASNIGGKQALETVQRLLPVLCQAHGLT  
PEQVVAIASNIGGKQALETVQRLLPVLCQAHGLTPEQVVAIASNNGGKQALETVQRLLPVLCQAHGLTPEQ  
VVAIASNNGGKQALETVQRLLPVLCQAHGLTPEQVVAIASNIGGKQALETVQRLLPVLCQAHGLTPEQV  
VAIASNNGGKQALETVQRLLPVLCQAHGLTPEQVVAIASNNGGKQALETVQRLLPVLCQAHGLTPEQVVAI  
ASNIGGKQALETVQRLLPVLCQAHGLTPEQVVAIASNNGGKQALETVQRLLPVLCQAHGLTPEQVVAIASN  
IGGKQALETVQRLLPVLCQAHGLTPEQVVAIASNIGGKQALETVQRLLPVLCQAHGLTPEQVVAIASNNGG  
KQALETVQRLLPVLCQAHGLTPEQVVAIASNIGGKQALETVQRLLPVLCQAHGLTPEQVVAIASHDGGRPA  
LESIVAQLSRPDALAALTDHDLVALACLGGPALDAVKKGLPHAPALIKRTNRRIPERTSHRVAASGGGG  
SGGGGSNGAIGDLLLLNFPDMSVLERQRAHLKYLPERLRRILTNPTFDSPLAGFFADSSMITGGEMDSYL  
STAGLNLPMMYGETTVEGDSRLSISPETTLGTGNFKA AKFDTETKDCNEAAKKMTMNRDDLVEEGEEES  
KITEQNGSTKSIKKMKHKAKKEENNFSNDSSKVTKELEKTDYIHVRARRGQATDSHSIAERVREKISER  
MKFLQDLVPGCDKITGKAGMLDEIINYVQSLQRQIEFLSMKLAIVNPRPDFMDDIFAKEVASTPMTVVPS  
EMVLSGYSEMVSHEMVSSEMVNSGYLHVNPQQVNTSSDPLSCFNNGEAPSMWDSHVQNLYGNLGV

> HA-TALE(*ng2*, C63)-GS-iNES2-cib1-mutNLS

YPYDVPDYASRTRLPSPPAPSPAFSADSFSDLLRQFDPSLFNTSLFDSLPPFGAHHTEAATGEWDEVQSGLR  
AADAPPPTMRVAVTAARPPRAKPAPRRRAAQPSDASPAAQVDLRTLGYSSQQQEQEKIKPKVVRSTVAQHHEA  
LVGHGFTHAHIVALSQHPAALGTVAVKYQDMIAALPEATHEAIVGVGKQWSGARALEALLTVAGELRGP  
LQLDTGQLLKIARKGGVTAVEAVHAWRNALTGAPLNLTPEQVVAIASNNGGKQALETVQRLLPVLCQAH  
GLTPEQVVAIASNNGGKQALETVQRLLPVLCQAHGLTPEQVVAIASNIGGKQALETVQRLLPVLCQAHGLT  
PEQVVAIASNIGGKQALETVQRLLPVLCQAHGLTPEQVVAIASNNGGKQALETVQRLLPVLCQAHGLTPEQ  
VVAIASNNGGKQALETVQRLLPVLCQAHGLTPEQVVAIASNIGGKQALETVQRLLPVLCQAHGLTPEQV  
VAIASNNGGKQALETVQRLLPVLCQAHGLTPEQVVAIASNIGGKQALETVQRLLPVLCQAHGLTPEQV  
VAIASNNGGKQALETVQRLLPVLCQAHGLTPEQVVAIASNNGGKQALETVQRLLPVLCQAHGLTPEQVVAI  
ASNIGGKQALETVQRLLPVLCQAHGLTPEQVVAIASNNGGKQALETVQRLLPVLCQAHGLTPEQVVAIASN  
IGGKQALETVQRLLPVLCQAHGLTPEQVVAIASNIGGKQALETVQRLLPVLCQAHGLTPEQVVAIASNNGG  
KQALETVQRLLPVLCQAHGLTPEQVVAIASNIGGKQALETVQRLLPVLCQAHGLTPEQVVAIASHDGGRPA  
LESIVAQLSRPDALAALTDHDLVALACLGGPALDAVKKGLPHAPALIKRTNRRIPERTSHRVAASGGGG  
SGGGGSNGAIGDLLLLNFPDMSVLERQRAHLKYLNPTFDSPLAGFFADSSMITGGEMDLYPERLRRILTSYL  
STAGLNLPMMYGETTVEGDSRLSISPETTLGTGNFKA AKFDTETKDCNEAAKKMTMNRDDLVEEGEEES  
KITEQNGSTKSIKKMKHKAKKEENNFSNDSSKVTKELEKTDYIHVRARRGQATDSHSIAERVREKISER  
MKFLQDLVPGCDKITGKAGMLDEIINYVQSLQRQIEFLSMKLAIVNPRPDFMDDIFAKEVASTPMTVVPS  
EMVLSGYSEMVSHEMVSSEMVNSGYLHVNPQQVNTSSDPLSCFNNGEAPSMWDSHVQNLYGNLGV

> HA-TALE(*ng2*, C63)-GS-iNES3-cib1-mutNLS

YPYDVPDYASRTRLPSPPAPSPAFSADSFSDLLRQFDPSLFNTSLFDSLPPFGAHHTEAATGEWDEVQSGLR  
AADAPPPTMRVAVTAARPPRAKPAPRRRAAQPSDASPAAQVDLRTLGYSSQQQEQEKIKPKVVRSTVAQHHEA  
LVGHGFTHAHIVALSQHPAALGTVAVKYQDMIAALPEATHEAIVGVGKQWSGARALEALLTVAGELRGP  
LQLDTGQLLKIARKGGVTAVEAVHAWRNALTGAPLNLTPEQVVAIASNNGGKQALETVQRLLPVLCQAH  
GLTPEQVVAIASNNGGKQALETVQRLLPVLCQAHGLTPEQVVAIASNIGGKQALETVQRLLPVLCQAHGLT





PEQVVAIASNIGGKQALETVQRLLPVLCQAHGLTPEQVVAIASNNGGKQALETVQRLLPVLCQAHGLTPEQ  
VVAIASNNGGKQALETVQRLLPVLCQAHGLTPEQVVAIASNIGGKQALETVQRLLPVLCQAHGLTPEQVV  
AIASNNGGKQALETVQRLLPVLCQAHGLTPEQVVAIASNNGGKQALETVQRLLPVLCQAHGLTPEQVVAI  
ASNIGGKQALETVQRLLPVLCQAHGLTPEQVVAIASNNGGKQALETVQRLLPVLCQAHGLTPEQVVAIASN  
IGGKQALETVQRLLPVLCQAHGLTPEQVVAIASNIGGKQALETVQRLLPVLCQAHGLTPEQVVAIASNNGG  
KQALETVQRLLPVLCQAHGLTPEQVVAIASNIGGKQALETVQRLLPVLCQAHGLTPEQVVAIASHDGGRPA  
LESIVAQLSRPDPALAAALNDHLVALACLGGRPALDAVKKGLPHAPALIKRTNRRIPERTSHRVAASSPKKK  
RKVEASNGAIGDLLLLNFPDMSVLERQRAHLKYLNPFDSPLAGFFADSSMITGGEMDSYLSTAGLNLPM  
MYGETTVEGDSRLSISPETTLGTGNFKRKFDTETKDCNEKKKKMTMNRDDLVEEGEEESKITEQNNGST  
KSIKMKHKAKKEENNFSNDSKVTKELEKTDYIHVRARRGQATDSHSIAERVREKISERMKFLQDLVPG  
CDKITGKAGMLDEIINYVQSLQRQIEFLSMKLAIVNRPDPDFMDDDIFAKEVASTPMTVVPSPPEMVLVSGYGGG  
PLSCFNNGEAPSMWDHSVQNLVGNLGV

> **alpha-importin-NLS-CRY2PHR-NLS-VP64\_2A\_GFP**

MKRPAATKKAGQAKKKKKMDKKTIVWFRRLRIEDNPALAAAHEGSVFPVFIWCPEEEGQFYFGRASR  
WWMKQSLAHLSQLKALGSDLTLIKTHNTISAILDCIRVTGATKVVFNHLYDPVSLVRDHTVKEKLVERGI  
SVQSYNGDLLYEPWEIYCEKGPFTSFNSYWKKCLDMSIESVMLPPPWRMPITAAAEAIWACSIEELGLE  
NEAEKPSNALLTRAWSPGWSNADKLLNEFIEKQLIDYAKNSKKVVGNNSTSLSPYLHFGAISVRHVFCAR  
MKQIIWARDKNSEGEESADLFLRGIGLREYSRYICFNPFTHQSLLSHLRFFPWDADVDKFKAWRQGRGTG  
YPLVDAGMRELWATGWMHNRIRVIVSSFAVKFLLLPWKWGMKYFWDTLDDADLECDILGWQYISGSIPD  
GHELDRLDNPALQGAKYDPEGEYIRQWLPELARLPTEWIHPWDAPLTVLKASGVELGTNYAKPIVDIDTA  
RELLAKAISRTREAQIMIGAAPASPKKKRKRKVEASGSGRADALDDFDLMLGSDALDDFDLMLGSDALDD  
FDLMLGSDALDDFDLMLINSRGSGEGRGSLTCGDVEENPGPVSKGEELFTGVVPILEVELDGDVNGHKF  
SVSGEGEGDATYGLTKLFICTTGKLPVPWPTLVTTLYGVQCFSRYPDHMKQHDFFKSAMPEGYVQERTI  
FFKDDGNYKTRAEVKFEGDTLVNRIELKIDFKEDGNILGHKLEYNYNSHNVYIMADKQKNGIKVNFKIRH  
NIEDGSVQLADHYQNTPIGDGPVLLPDNHYLSTQSALS KDPNEKRDHMLLEFVTAAGITLGMDEL YKV

> **mutNES-CRY2PHR-NLS-VP64\_2A\_GFP**

MEQKLISEEDLKMDKKTIVWFRRLRIEDNPALAAAHEGSVFPVFIWCPEEEGQFYFGRASR WWMKQSL  
AHLSQLKAAGSDATLIKTHNTISAILDCIRVTGATKVVFNHLYDPVSLVRDHTVKEKLVERGISVQSYNGD  
LLYEPWEIYCEKGPFTSFNSYWKKCLDMSIESVMLPPPWRMPITAAAEAIWACSIEELGLENEAEKPSNA  
LLTRAWSPGWSNADKLLNEFIEKQLIDYAKNSKKVVGNNSTSLSPYLHFGAISVRHVFCARMKQIIWARD  
KNSEGEESADLFLRGIGLREYSRYICFNPFTHQSLLSHLRFFPWDADVDKFKAWRQGRGTGYPLVDAGMR  
ELWATGWMHNRIRVIVSSFAVKFLLLPWKWGMKYFWDTLDDADLECDILGWQYISGSIPDGHELDRLDNP  
ALQGAKYDPEGEYIRQWLPELARLPTEWIHPWDAPLTVLKASGVELGTNYAKPIVDIDTARELLAKAISR  
TREAQIMIGAAPASPKKKRKRKVEASGSGRADALDDFDLMLGSDALDDFDLMLGSDALDDFDLMLGSD  
ALDDFDLMLINSRGSGEGRGSLTCGDVEENPGPVSKGEELFTGVVPILEVELDGDVNGHKFSVSGEGEGD  
ATYGLTKLFICTTGKLPVPWPTLVTTLYGVQCFSRYPDHMKQHDFFKSAMPEGYVQERTIFFKDDGNY  
KTRAEVKFEGDTLVNRIELKIDFKEDGNILGHKLEYNYNSHNVYIMADKQKNGIKVNFKIRHNIEDGSVQ  
LADHYQNTPIGDGPVLLPDNHYLSTQSALS KDPNEKRDHMLLEFVTAAGITLGMDEL YKV

> **CRY2PHR-NLS-VP64-NLS\_2A\_GFP**

MKMDKKTIVWFRDLRIEDNPALAAAHEGSVFPVFIWCPEEEGQFYPRGRASRWWMKQSLAHLSQLKA  
 LGSDLTLIKHTHTISAILDCIRVTGATKVVFNHLYDPVSLVRDHTVKEKLVVERGISVQSYNGDLLYEPWEIY  
 CEKGKPFSTFNSYWKKCLDMSIESVMLPPPWRMLPITAAAEAIWACSIIEELGLENEAEKPSNALLTRAWSP  
 GWSNADKLLNEFIEKQLIDYAKNSKKVVGNSTLLSPYLHFGEISVRHVFQCARMKQIIWARDKNSEGEES  
 ADLFLRGIGLREYSRYICFNFPFTHEQSLLSHLRFFPWDADVDKFKAWRQGRGTGYPLVDAGMRELWATGW  
 MHNRRIVIVSSFAVKFLLLPWKWGMKYFWDTLDDADLECDILGWQYISGSIPDGHELDRLDNPALQGAKY  
 DPEGEYIRQWLPELARLPTEWIIHPWDAPLTVLKASGVELGTNYAKPIVDIDTARELLAKAISRTREAIQMI  
 GAAPASPKKKRKVEASGSGRADALDDFDLMLGSDALDDFDLMLGSDALDDFDLMLGSDALDDFDL  
 DMLINSPPKKRKVEASSRGSGEGRSLLTCGDVEENPGPVSKGEELFTGVVPILVELDGDVNGHKFSVSGE  
 GEGDATYGKLTCLKICTTGKLPVPWPTLVTTLTGYVQCFSRYPDHMKQHDFFKSAMPEGYVQERTIFFKDD  
 GNYKTRAEVKFEGDTLVNRIELKGIDFKEDGNILGHKLEYNYNSHNVYIMADKQKNGIKVNFKIRHNIEDG  
 SVQLADHYQQNTPIGDGPVLLPDNHYLSTQSALS KDPNEKRDMVLLFVTAAGITLGMDELYKV

> **Neurog2-TALE(N240,C63)-PYL**

MSRTRLPSPAPSPAFSADSFSDLLRQFDPSLFNTSLFDSLPPFGAHTTEAATGEWDEVQSGLRADAPPPT  
 MRVAVTAARPPRAKAPRRRAAQPSDASPAAQVDLRTLGYSSQQQEKIKPKVRSTVAQHHEALVGHGFT  
 HAHIVALSQHPAALGTVAVKYQDMIAALPEATHEAIVGVGKQWSGARALEALLTVAGELRGPPLQLDTGQ  
 LLKIAKRGVTAVEAVHAWRNALTGAPLNLTPQVVAIASHNGGKQALETVQRLLPVLCQAHGLTPEQV  
 VAIASNIGGKQALETVQRLLPVLCQAHGLTPEQVVAIASNIGGKQALETVQRLLPVLCQAHGLTPEQVVAI  
 ASNGGGKQALETVQRLLPVLCQAHGLTPEQVVAIASHNGGKQALETVQRLLPVLCQAHGLTPEQVVAIAS  
 NIGGKQALETVQRLLPVLCQAHGLTPEQVVAIASNIGGKQALETVQRLLPVLCQAHGLTPEQVVAIASHN  
 GGKQALETVQRLLPVLCQAHGLTPEQVVAIASNIGGKQALETVQRLLPVLCQAHGLTPEQVVAIASNGGG  
 KQALETVQRLLPVLCQAHGLTPEQVVAIASNIGGKQALETVQRLLPVLCQAHGLTPEQVVAIASNIGGKQ  
 LETVQRLLPVLCQAHGLTPEQVVAIASNIGGKQALETVQRLLPVLCQAHGLTPEQVVAIASNIGGKQ  
 VKKGLPHAPALIKRTNRRIPERTSHRVAASMANSESSSPVNEEENSQRISTLHHQTMPSDLTQDEFTQLSQS  
 IAEFHTYQLGNGRCSLLAQRIHAPPETVWSVVRFRDRPQIYKHFISCNVSEDFEMRVGCTRDVNVISGLP  
 ANTSRERLDLDDRRVTGFSITGGEHRLRNYKSVTTVHRFEKEEEEEERIWTVVLESYVVDVPEGNSEEDT  
 RLFADTVIRLNLQKLASITEAMNRRNNNNNNSSQVR

> **ABI-NLS-VP64**

MVPLYGFTSICRRPEMEEAAVSTIPRFLQSSSGSMLDGRFDPQSAAHFFGVYDGHGGSQVANYCRERMHL  
 ALAEIEIAKEKPMLCDGDTWLEKWKKALFNSFLRVDSEIESVAPETVGSTSVVAVVFP SHIFVANC GDSRAV  
 LCRGKTALPLSVDHKKPDREDEAARIEAAGGKVIQWNGARVFGVLA MSRSIGDRYLKPSIIPDPEVTAVKRV  
 KEDDCLILASDGVWDMTDEEACEMARKRILLWHKKNAVAGDASLLADERRKEGKDPAAAMSAAEYLSK  
 LAIQRGSKDNISVVVDLKPRLKSKPLNASPKKKRKVEASGSGRADALDDFDLMLGSDALDDFDLDM  
 LGSDALDDFDLMLGSDALDDFDLMLIN

> **hSpCas9(D10A,H840A)-Linker-NLS-VP64**

MDKKYSIGLAIGTNSVGWAVITDEYKVPSSKFKVLGNTDRHSIKKNLIGALLFDSGETAEATRLKRTARRR  
 YTRRKNRICYLQEIFSNEMAKVDDSFHRLVESFLVEEDKKHERHPHIFGNIVDEVAYHEKYPTIYHLRKKLV  
 DSTDKADRLRIYLALAHMIKFRGHFLIEGDLNPDNSVDKLFILVQTYNQLFEENPINASGVDKAILSAR  
 LSKSRLENLIAQLPGEKKNLFGNLIALSLGLTPNFKSNFDLAEDAKLQLSKDTYDDDLNLLAQIGDQY  
 ADLFLAAKNLSDAILSDILRVNTEITKAPLSASMIKRYDEHHQDLTLLKALVRQQLPEKYKEIFFDQSKNG  
 YAGYIDGGASQEEFYKFIKPILEKMDGTEELLVKLNREDLLRKQRTFDNGSIPHQIHLGELHAILRRQEDFYF  
 FLKDNREKIEKILTFRIPYYVGPLARGNSRFAWMTRKSEETITPWNFEVVDKGGASQSFIERMTNFDKNLP  
 NEKVLPHSLLYEYFTVYNELTKVKYVTEGMRKPAFLSGEQKKAIVDLLFKTNRKVTVKQLKEDYFKKIE

CFDSVEISGVEDRFNASLGTYHDLLKIIKDKDFLDNEENEDILEDIVLTLTLFEDREMIEERLKYAHLFDDK  
 VMKQLKRRRYTGWGRLSRKLINGIRDKQSGKTILDFLKSDFANRNFMLIHDDSLTFKEDIQKAQVSGQG  
 DSLHEHIANLAGSPAIKKILQTVKVVDELVKVMGRHKPENIVIEMARENQTTQKGQKNSRERMKRIEEGI  
 KELGSQILKEHPVENTQLQNEKLYLYYLQNGRDMYVDQELDINRLSDYDVAIVPQSFLKDDSIDNKVLR  
 SDKNRGKSDNVPSEEVVKKMKNYWRQLLNAKLITQRKFDNLTKAERGGLSELDKAGFIKRQLVETRQITK  
 HVAQILDSRMNTKYDENDKLIREVKVITLKSCLVSDFRKDFQFYKREINNYHHAHDAYLNAVVGTAIK  
 KYPKLESEFVYGDYKVVYDVRKMIKSEQEIGKATAKYFFYSNIMNFFKTEITLANGEIRKRPLIETNGETGEI  
 VWDKGRDFATVRKVLSPQVNIKKTEVQTGGFSKESILPKRNSDKLIARKKDWDPKKGFFSPTVAYS  
 VLVVAKVEKGKSKKLSVKELGITIMERSSEFEKNPIDFLEAKGYKEVKKDLIILPKYSLFELENGRKRML  
 ASAGELQKGNELALPSKYVNFLYLASHYEKLGSPEDNEQKQLFVEQHKHYLDEIIEQISEFSKRVLADAN  
 LDKVLSAYNKHRDKPIREQAENIHLFTLNLGAPAAFKYFDTTIDRKRYTSTKEVLDATLIHQISITGLYETRI  
 DLSQLGGDSAGGGGSGGGGSGGGGSGPKKRRKVAAGSGRADALDDFDLMLGSDALDDFDLMLGSD  
 ALDDFDLMLGSDALDDFDLMLIN

>SID4X-NLS-FLAG-Linker-hSpCas9(D10A,H840A)-NLS

MSGGMNIQMLLEAADYLERREREAHEGYASMLPGSGMNIQMLLEAADYLERREREAHEGYASMLPGSG  
 MNIQMLLEAADYLERREREAHEGYASMLPGSGMNIQMLLEAADYLERREREAHEGYASMLPSRSAGPKK  
 KRKVAADYDKDDDDKSRLEPGEKPYKCEPGKSFSSQSGALTRHQTRDKKYSIGLAIGTNSVGWAVIT  
 DEYKVPKFKVGLGNTDRHSIKKNLIGALLFDSGETAEATRLKRTARRRYTRRKNRICYLQEIFSNEMAKV  
 DDSFFHRLEESFLVEEDKKHERHPHIFGNVDEVAYHEKYPTIYHLRKKLVSDTKADLRLIYALAHMIKFR  
 GHFLIEGDLNPDNSVDKLFQVLVQTYNQLFEENPINASGVDAKAILSARLSKSRLENLIAQLPGEKKNGLF  
 GNLIASLGLTPNFKSNFDLAEDAKLQLSKDYDDDLNLLAQIGDQYADLFLAAKNLSDAILLSDILRVNT  
 EITKAPLSASMIKRYDEHHQDLTLLKALVRQQLPEKYKEIFFDQSKNGYAGYIDGGASQEEFYKFIKPILEK  
 MDGTEELLVKLNREDLLRKQRTFDNGSIPHQIHLGELHAILRRQEDFYFPLKDNREKIEKILTFRIPYVGPL  
 ARGNSRFAMTRKSEETITPWNFEEVVDKASQSFIERMTNFDKNLPNEKVLPHSLLYEYFTVYNELTK  
 VKYVTEGMRKPAFLSGEQKKAIVDLLFKTNRKVTVKQLKEDYFKKIECFDSVEISGVEDRFNASLGTYHD  
 LKIIKDKDFLDNEENEDILEDIVLTLTLFEDREMIEERLKYAHLFDDKVMKQLKRRRYTGWGRLSRKLING  
 IRDKQSGKTILDFLKSDFANRNFMLIHDDSLTFKEDIQKAQVSGQGDSLHEHIANLAGSPAIKKILQTV  
 KVVDELVKVMGRHKPENIVIEMARENQTTQKGQKNSRERMKRIEEGIKELGSQILKEHPVENTQLQNEKLY  
 LYYLQNGRDMYVDQELDINRLSDYDVAIVPQSFLKDDSIDNKVLRSDKNRGKSDNVPSEEVVKKMKN  
 YWRQLLNAKLITQRKFDNLTKAERGGLSELDKAGFIKRQLVETRQITKHVAQILDSRMNTKYDENDKLIRE  
 VKVITLKSCLVSDFRKDFQFYKREINNYHHAHDAYLNAVVGTAIKKYPKLESEFVYGDYKVVYDVRKMI  
 AKSEQEIGKATAKYFFYSNIMNFFKTEITLANGEIRKRPLIETNGETGEIVWDKGRDFATVRKVLSPQVNI  
 VKKTEVQTGGFSKESILPKRNSDKLIARKKDWDPKKGFFSPTVAYSVLVAKVEKGKSKKLSVKEL  
 GITIMERSSEFEKNPIDFLEAKGYKEVKKDLIILPKYSLFELENGRKRMLASAGELQKGNELALPSKYVNFL  
 YLASHYEKLGSPEDNEQKQLFVEQHKHYLDEIIEQISEFSKRVLADANLTKVLSAYNKHRDKPIREQAEN  
 IHLFTLNLGAPAAFKYFDTTIDRKRYTSTKEVLDATLIHQISITGLYETRIDLSQLGGDKRPAATKKAGQAK  
 KKK

## Epigenetic effector domain sequences

>hs\_NCoR

ASSPKKRRKVEASMGMLMEDPMKVYKDRQFMNVWTDHEKEIFKDKFIQHPKNFGLIASYLERKSVPCV  
 LYYLTKKNENYKEF

>pf\_Sir2A

ASSPKKRRKVEASMGMLMISFLKKTQSITLLELAKIICKCKHVVALTGSGTSAESNIPFRGSSNSIWSKYD  
 PRIYGTIWGFWKYPEKIWEVIRDISSDYEIEINNGHVALSTLESGLYKSVVTQNVVDGLHEASGNTKVISLHG



NVFEAVCCTCNKIVKLNKIMLQKTSHFMHQLPPECPCGGIFKPNILFGEVVSSDLLKEAEEEEIAKCDLLVI  
GTSSTVSTATNLCHFACKKKKKIVEINISKTYITNKMSDYHVCAKFSSELTKVANILKGSSEKNKKIMEF

>nc\_DIM5

ASSPKKKRKVEASMEKAFRPHFFNHGKPDANPKEKKNCHWCQIRSFATHAQLPISIVNREDDAFLNPNFRFI  
DHSIIGKNVPVADQSFRVGCSCASDEECMYSTCQCLDEMAPDSDEEADPYTRKKRFAYYSQGAKKGLLRD  
RVLQSQEPIYECHQGCASCSDPCPNRVVERGRVPLQIFRTKDRGWGVKCPVNIKRGQFVDRYLGEIITSEE  
DRRAESTIARRKDVYLFALDKFSDPDSLDPDLAGQPLEVDGEYMSGPTRFINHSCDPNMAIFARVGDHAD  
KHIHDLALFAIKDIPKGTTELTFDYVNGLTGLESDAHDPKISEMTKCLCGTAKCRGYLWEF

>sc\_HST2

ASSPKKKRKVEASTEMSVRKIAAHMKSNNPAKVFIMVGAGISTSCGIPDFRSPGTGLYHNLARLKLYPEA  
VFDVDFQSDPLPFYTLAKELYPGNFRPSKFHYLLKLFQDKDVLKRVYVYQNDTLERQAGVKDDLIEAHGS  
FAHCHCIGCGKVYPPQVFKSKLAEHPKDFVKCDVCGELVKPAIVFFGEDLPDSFSETWLNDSWLRKITT  
SGKHPQQPLVIVVGTSLAVYPFASLPEEIPRKVKRVLCNLETVGDVFKANKRPTDLIVHQYSDEF AEQLVEEL  
GWQEDFEKILTAQGGMGEF

>hs\_SIRT3

ASSPKKKRKVEASMGAGISTPSGIPDFRSPGSLYSNLQYDLPYPEAIFELPFFFHNPKPFFTLAKELYPG  
NYKPNVTHYFLRLLHDKGLLLRLYTQNDGLERVSGIPASKLVEAHGTFASATCTVCQRPFPGEDIRADVM  
ADRVPRCPVCTGVVCPDIVFFGEPLPQRFLHVVDFPMADLLLILGTSLEVEPFASL TEAVRSSVPRLLINRD  
LVGPLAWHPRSRDVAQLGDVVHGVESLVELLWTEEMRDLVQRETGKLDGPDKEF

>hs\_NIPP1

ASSPKKKRKVEASMAAAANSGLSPLFDCPTWAGKPPPGLHLDVVKGDKLEKLIIDEKKYYLFRNPDLC  
DFTIDHQSCSRVHAALVYHKHLKRVFLIDLNSTHGTFLGHIRLEPHKPPQIPIDSTVSFGASTRAYTLREKPK  
TLPSAVKGDKMGGEDDELKGLLGLPEEETELDNLEFNTAHNKRISTLTIEGNLDIQRPKRKRKNSRVTF  
SEDDEIINPEDVDPSVGRFRNMVQTA VVPVKKKRVVEGPGSLGLEESGSRMQNF AFSGLLYGGLPPTHSEA  
GSQPHGIHGTALIGGLPMPYPNLAPDVLTPVPSAVNMNPAPNPAVYNPEAVNEEF

>ct\_NUE

ASSPKKKRKVEASMTNSTQDTLYLSLHGGIDSAIPYPVRRVEQLLQFSFLPELQFQNAAVKQRIQRLCYRE  
EKRLAVSSLAKWLGQLHKQRLRAPKNPPVAICWINSYVGYGVFARESIPAWSYIGEYTGILRRRQALWLDE  
NDYCFRYPVPRYSFRYFTIDSGMQGNVTRFINHSDNPNLEAIGAFENGIFHIIIRAIKDILPGEELCYHYGPLY  
WHRKKEEFVPEEEF

>hs\_MBD2b

ASSPKKKRKVEASARYLGNTVDLSSDFRTGKMMPSKLQKNKQRLNDPLNQNKGKPDNLNTLPIRQTASI  
FKQPVTKVTNHPSNKVKSQPMNEQPRQLFWKRLQGLSASDVTEQIIKTMELPKGLQGVGPGSNDET  
LSAVASALHTSSAPITGVSAAVEKNPAVWLNTSQPLCKAFIVTDEDIRKQEERVQQRKILEDALMADILS  
RAADTEEMDIEMDSGDEAEF

>ca\_HST2

ASSPKKKRKVEASMPSLDDILKPVAEAVKNGKKVTFNAGAGISTGAGIPDFRSPDTGLYANLAKLNLPF  
AVFDIDFFKEDPKPFYTLAEELYPGNFAPTGFHFIKLLQDQGSLLKRVYVYQNDTLERLAGVEDKYIVEAHG  
SFASNHCVDCHKEMTTETLTKTYMKDKKIPSCQHCEGYVKPDIVFFGEGLPVKFFDLWEDDCEDVEVAIVA  
GTSLTVFPFASLPGEVNKKCLRVLVNKEKVGTFKHEPRKSDIIALHDCDIVERLCTLLGLDDKLNEVYEKE  
KIKYSKAETKEIKMHEIEDKLKEEAHLKEDKHTTKVDKKEKQNDANDKELEQLIDKAKAEF

>hs\_PHF19

ASSPKKKRKVEASMENRALDPGTRDSYGATSHLPNGALAKVKNNFKDLMMSKLTGQYVLCRWDGLY  
YLGKIKRVSSSKQSLVTFEDNSKYWVLWKDIQHAGVPGEEPKNICLGTSGPLNEILICGKCGLYHQ  
CHIPIAGSADQPLLTPWFCRRCIFALAVRKGALKKGAARTLQAVKMLVSYQPEELEWDSPHRTNQQQC  
CYCGGPGEWYLRMLQCYRCRQWFHEACTQCLNEPMMFGDRFYLFVFCVSNQGGPGSGSDSSAEGASVPE  
RPDEGIDSHTFESISSEDDSSLHLKSSITNYFGAAGRLACGEKYQVLARRVTPEGKVQYLVEWEGTTPYEF

## &gt;hs\_HDAC11

ASSPKKKRKVEASMLHTTQLYQHPETRWPIVYSPRYNITFMGLEKLHPFDAGKWGKVINFLKEEKLLSDS  
MLVEAREASEEDLLVVHTRRYLNELKWSFAVATITEIPPVIFLPNFLVQRKVLRLRPLRTQTGGTIMAGKLAVE  
RGWAINVGGGFHHCSSDRGGGFCAAYADITLAIKFLFERVEGISRATIIDLDAHQGNNGHERDFMDDKRVIYIM  
DVYNRHIYPGDRFAKQAIRRKVELEWGTEDDEYLDKVERNIKKSLQEHLDPVVVYNAGTDILEGDRLGGL  
SISPAGIVKRDELVFRMVRGRRVPILMVTSGGYQKRTARIHADSILNLFGLGLIGPESPSVSAQNSDTPLLPPA  
VPEF

## &gt;ml\_MesoLo4

ASSPKKKRKVEASMPQLIVHHPDYDAGFATNHRFPMSKYPLLMEALRARGLASPDALNTTEPAPASWLKL  
AHAADYVDQVISCVPEKIEREIGFPVGPVSLRAQLATGGTILAAARLALRHGIACNTAGGSHHARRAQA  
GFCTFNDVAVASLVLLDEGAAQNILVVDLDVHQDGTADILSDEPGVFTFSMHGERNYPVRKIASDLIAL  
PDGTGDAAYLRRLATILPELSARARWDIVFYNAGVDVHAEDRLGRLALSNGGLRARDEMVIHGFALGIP  
VCGVIGGGYSTDVPALASRHAILFEVASTYAEF

## &gt;pbcv1\_vSET

ASSPKKKRKVEASMFNDRVIVKKSPLGGYGVFARKSFEKGELVEECLCIVRHNDWDGTALEDYLFSTRKNM  
SAMALGFGAIFNHSKDPNARHELTAGLKRMRIFTIKPIAIGEEITISYGDDYWLSRPLRTQNEF

## &gt;at\_KYP

ASSPKKKRKVEASDISGGLEFKGIPATNRVDDSPVSPTSFTYIKSLIIEPNVIIPKSSTGCNCRGSCDTSKKCA  
CAKLNNGNFPYVDLNDGRLIESRDVVFECGPHCGGPKCVNRTSQKRLRFNLEVFSAKKGWAVRSWEYI  
PAGSPVCEYIGVRRRTADVDTISDNEYIFEIDCQQTMOGLGGRQRRLRDVAVPMNNGVSQSSEDENAPEFC  
IDAGSTGNFARFINHSCEPNLFVQCVLSSHQDIRLARVVLFAADNISPMEQELTYDYGALDSVHEF

## &gt;tg\_TgSET8

ASSPKKKRKVEASASRRTGEFLRDAQAPSRWLKRSKTGQDDGAFCLLETWLAGAGDDAAGGERGRDREGA  
ADKAKQREERRQKELEERFEEMKVEFEKAQRMIAARRAALTGEIYSDGKGSKKPRVPSLPENDDALIEIII  
DPEQGILKWPLSVMSIRQRTVIYQECLRRDLTACIHLTKVPGKGRAVFAADTILKDDFVVEYKGEKCSEREA  
REREQRYNRSKVPMGSFMFYFKNGSRMMAIDATDEKQDFGPARLINHSRRNPNMTPRAITLGDNFSEPRLI  
FVARRNIEKGEELLVDYGERDPDVIKEHPWLNSEF

## &gt;hs\_SIRT6

ASSPKKKRKVEASMSVNYAAGLSPYADKGGKGLPEIFDPPEELERKVVWELARLVWQSSSVVFHTGAGISTA  
SGIPDFRPHGVWTEERGLAPKFDTTFESARPTQTHMALVQLERVGLLRFVLSQNVLDGLHVRSGFPRDK  
LAELHGNMFVEECAKCKTQYVRDVTVVGTMGLKATGRLCTVAKARGLRACRGELRDTILDWEDSLPDRDL  
ALADEASRNADLSITLGTSLQIRPSGNLPLATKRRGGRLVIVNLQPTKHDRHADLRIHGYVDEVMTRLMKH  
LGLEIPAWDGPVRLERLPPLEF

## &gt;ce\_Set1

ASSPKKKRKVEASMKVAACKLATSRMRKDRAAAAASPSSEIENSENPSLASHSSSSGRMTPSKNTRSRKGV  
SVKDVSNHKITEFFQVRRSNRKTQSKISDEAKHALRDTVLKGTNERLLEVYKDVVKGRGIRTKVNFEGDF  
VVEYRGVMMMEYSEAKVIEEQYSNDEEIGSYMYFFEHNKKWCIDATKESPWKGRLINHSVLRPNLKTQV  
EIDGSHHLILVARRQIAQGEELLYDYGDRSAETIAKNPWLVNTEF

## &gt;mm\_G9a

ASSPKKKRKVEASVRTEKIICRDVARGYENVPIPCVNGVDGEPCEPYKYISENCETSTMNIDRNITHLQHC  
TCVDDCSSNCLCGQLSIRCWYDKDGRLLQEFNKIEPPLIFECNQACSCWRSCNRVQSGIKVRLQLYRT  
AKMGWGVRLALQTIPTQGTICEYVYVGLISDAEADVREDDSYLFDLNDKDGVEYCIDARYYGNISRFINHLCD  
PNIIPVRVFMHLQDLRFPRIAFFSSRDIRTGEELGFDYGDYDFWDIKSKYFTCQCGSEKCKHSAEIAIAEQSRL  
ARLDHPPELLPDLSSLPINTEF

## &gt;hs\_SIRT5

ASSPKKKRKVEASSSMADFRKFFAKAKHIVIISGAGVSAESGVPTFRGAGGYWRKWQAQDLATPLAFAH  
NPSRVWEFYHYRREVMGSKEPNAGHRAIAECETRLGKQGRRVVVITQNIDELHRKAGTKNLEIHGSLFKT  
RCTSCGVVAENYKSPICPALSGBKGAPEPGTQDASIPVEKLPRCEEAGCGGLLRPHVVWFGENLDPALIEEVD

RELAHCDLCLVVGTSVVYPAAMFAPQVAARGVPVAEFNTETTPATNRFHFHQGPCGTTLPEALACHEN  
ETVSEF

>xl\_HDAC8

ASSPKKKRKVEASMSRVVVKPKVASMEEMAAFHDTAYLQHLHKVSEEGDNDDPETLEYGLGYDCPITEGIY  
DYAAAVGGATLTAAEQLEIGKTRIAVNWPGGWHHAKKDEASGFCYLNDVAVLGLKLREKFDRLVLYVDM  
DLHHGDGVEDAFSFTSKVMTVSLHKFSPGFFPGTGDVSDIGLGKGRYYSINVPLQDGIQDDKYYQICEGVL  
KEVFTTFNPEAVVLQLGADTIAGDPMCSFNMTPEGIGKCLKYVLQWQLPTLILGGGGYHLPNTARCWTYL  
TALIVGRTLSSSEIPDHEFFTEYGPDYVLEITPSCRPRNDTQKVQEILQSIKGNLKRVEF

>mm\_HP1a

ASSPKKKRKVEASMKEGENNKPREKSEGNKRKSSFSNSADDIKSKKKREQSNDIARGFERGLEPEKIIGATD  
SCGDLMLMKWKDTDEADLVLAKEANVKCPQIVIAFYEERL TWHAYPEDAENKEKESAKSEF

>at\_HDT1

ASSPKKKRKVEASMEFWGIEVKSQKPVTVTPEEGILIHVSQASLGECKNKKGEFVPLHVKVGNNQNLVLTGL  
STENIPQLFCDLVFDKEFELSHTWGKGSVYFVGYKTPNIEPQGYSEEEEEEEEEVPAGNAAKAVAKPKAKP  
AEVKPAVDDEEDESDDGMDDESDGEDSEEEPTPKKPASSKKRANETPKAPVSAKKAKVAVTPQKTD  
EKKKGGKAANQSEF

>mm\_SAl1

ASSPKKKRKVEASMSRRKQAKPQHFQSDPEVASLPRRDGDETEKGQPSRPTKSKDAHVCGRCCAEFFELSDL  
LLHKKSTKNQLVLIVNESPASPACTFPGPSLNDEF

>hs\_SETD8

ASSPKKKRKVEASSCDSTNAIAKQALKKPIKQAPRKAQGKTQQNRKLTDFYPVRRSSRKSKAELQSE  
ERKRIDELIESGKEEGMKIDLIDGKGRGVIATKQFSRGDFVVEYHGDLEITDAKKREALYAQDPSTGCYMY  
YFQYLSKTYCVDATRETNRLGRLINHSKCGNCQTKLHDIDGVPHLILIASRDIAAGEELLYDYGDRSKASIE  
AFPWLKHEF

>sc\_RPD3

ASSPKKKRKVEASRRVAYFYDADVGNYAYGAGHPMKPHRIRMAHSLIMNYGLYKKMEIYRAKPAKQKQ  
MCQFHTDEYIDFLSRVTPDNLEMFKRESVKFNVGDGDCPVFDGLYEYCSISGGGSMEGAARLNRGKCDVAV  
NYAGGLHHAKKSEASGFCYLNDIVLGIHELLRYHPRVLYIDIDVHHGDGVEEAFYTTDRVMTCSFHKYGEF  
FPGTDELDRDVGAGKNYAVNVPLRDGIDATYRSVFEPVIKIMEWYQPSAVVLQCGGDSLSGDRLGCF  
NLSMEGHANCVNYVKSFGIPMMVVGGGGYTMRNVARTWCFETGLLNNVLDKDLPEF

>ec\_CobB

ASSPKKKRKVEASMEKPRVLVLTGAGISAESGIRTFRAADGLWEEHRVEDVATPEGFDRDPELVQAFYNA  
RRRQLQPEIQPNAHLALAKLQDALGDRFLVTQNIDNLHERAGNTNVIHMHGELLKVRCSSQSGVLDW  
TGDVTPEDKCHCCQFPAPLRPHVVWFGEMPLGMDEIYMALSMADIFIAIGTSGHVYPAAGFVHEAKLHGA  
HTVELNLEPSQVGFNEFAEKYYGPASQVPEFVEKLLKGLKAGSIAEF

>hs\_SUV39H1

ASSPKKKRKVEASNLKCVRLKQFHKDLERELLRRHRSKTPRHLDPDSLANYLVQKAKQRRALRRWEQEL  
NAKRSHLGRITVENEVDLDGPPRAFVYINEYRVGEGITLNQVAVGCECQDCLWAPTGGCCPGASLHKFAY  
NDQGQVRLRAGLPIYECNSRCRCGYDCPNRVVQKIRYDLCIFRTDDGRGWGVRTLEKIRKNSFVMEYVG  
EITSEEAERRGQIYDRQGATYLFDLDYVEDVYTVDAAYYGNISHFVNHSKDPNLQVYNVFIDNLDERLPRI  
AFFATRITIRAGEELTFDYNMQVDPVDMESTRMDSNFGLAGLPGSPKRVRIECKCGTESCRKYLFEF

>hs\_RCOR1

ASSPKKKRKVEASSNSWEEGSSGSSSDEEHGGGMRVGPQYQAVVPDFDPAKLARRSQERDNLGMLVWS  
PNQNLSEAKLDEYIAIAKEKHGYNMEQALGMLFWHKHNIKSLADLPNFTFPDEWTVEDKVLFEQAFSF  
HGKTFHRIQQMLPDKSIASLVKFYYSWKKTRTKTSVMDRHARKQKRERESEDELEANGNNPIDIEVDQN  
KESKKEVPPTETVQVKKKEKHSTEF

>hs\_sin3a

ASSPKKKRKVEASYKESVHLETYPKERATEGIAMEIDYASCKRLGSSYRALPKSYQQPKCTGRTPLCKEVL  
NDTWVSFPSWSEDSTFVSSKKTQYEEHIYRCEDERFELDVVLETNLATIRVLEAIQKKLSRLSAEEQAKFRL  
DNTLGGTSEVIHRKALQRIYADKAADIIDGLRKNPSIAVPIVLKRLKMKKEEWREAQRGFNKVWREQNEKY  
YLKSLDHQGINFKQNDTKVLRSKSLLNEIESIYDERQEQAATEENAGVPVGPLSLAYEDKQILEDAALIIH  
HVKRQTGIQKEDKYKIKQIMHHFIPDLLFAQRGDLSDVEEEEEEMDVDEATGAVEF

>at\_SUVR4

ASSPKKKRKVEASQSAYLHVSLARISDEDCCANCKGNCLSADFPCTCARETSGEYAYTKEGLLKEKFLDTC  
LKMKEPDSFPKVYCKDCPLERDHDKGTYGKCDGHLIRKFIKECWRKCGCDMQCGNRVVQRGIRCQLQV  
YFTQEGKGWGLRTLQDLPGTGFICEYIGEILTNELYDRNVRSSEHTYPVTLADADWGSEKDLKDEEALC  
LDATICGNVARFINHRCEDANMIDIPIEIEIPDRHYHYHIAFFTLRDVKAMDELTDWYDIFNDKSHPVKA  
FRCCCSESCRDRKIKGSQGKSIERRKIVSAKKQQGSKEVSKRKEF

>rn\_MeCP2\_NLS

ASSPKKKRKVEASVQVKRVLEKSPGKLLVKMPFQASPGGKGGGATTSAQVMVIKRPGRKRKAEADPQ  
AIPKRRGRKPGSVVAAAAEAKKAVKESSIRSVQETVLPKIKRKTRETVSIEVKEVKPLLSTLGEKSGK  
GLKTCKSPGRKSKESPGRSSASSPPKKEHHHHHHHAESPKAPMPLPPPPPEPQSSDPISPPEPQDLSS  
SICKEEKMPRAGSLESDGCPKEPAKTQPMVAAAATTTTTTTTTVAEKYKHRGEGEKDIVSSMPRPNREE  
PVDSRTPVTERVSEF

>mm\_SET-TAF1B

ASSPKKKRKVEASMAPKRQSAILPQPKPRPAAAPKLEDKSASPGLPKGEKEQQAIEHIDEVQNEIDRLNE  
QASEEILKVEQYKNLQRPFQKRSELIKIPNFVTTTFVNHQVQSALLGEEDEEALHYLTRVEVTEFEDIKS  
GYRIDFYFDENPYFENKVLSEFHLNESGDPSSKSTEIKWKSGLDLTKRSSQTQNKASRKRQHEEPESFTW  
FTDHSADAGADELGEVIKDDIWPNPLOYYLVPDMDDEEGEAEDDDDDDEEEGLEIDEEGDEDEGEEDDD  
EDEGEEGEEDEGEDDEF

>ce\_Set4

ASSPKKKRKVEASMLHEQIANISVTFNDIPRSDHSMPTTELCYFDDFATTLVVDSVLNFTTHKMSKKRRY  
LYQDEYRTARTVMKTFREQRDWTNAIYGLLTLRSVSHFLSKLPPNKLFEFRDHIVRFLNMFILDSGYTIQEC  
KRYSQEGHQGAKLVSTGVWSRGDKIERLSGVVCLLSEDEDSILAQEGSDFSVMYSTRKRCSTLWLGPA  
YINHDCRPTCEVSHGSTAHIRVLRDMVPGDEITCFYGSEFFGPNNIDCECCTCEKNMNGAFSYLRGNENAE  
PIISEKKTKEYELRSRSEF

## Photostimulation Hardware Control Scripts

The following Arduino script was used to enable the individual control of each 4-well column of a light-stimulated 24-well plate

```
//Basic control code for LITE LED array using Arduino UNO

//LED column address initialization to PWM-ready Arduino outputs
int led1_pin = 3;
int led2_pin = 5;
int led3_pin = 6;
int led4_pin = 9;
int led5_pin = 10;
int led6_pin = 11;

//Maximum setting for Arduino PWM
int uniform_brightness = 255;

//PWM settings for individual LED columns
int led1_brightness = uniform_brightness/2;
int led2_brightness = uniform_brightness/2;
int led3_brightness = uniform_brightness/2;
int led4_brightness = uniform_brightness/2;
int led5_brightness = uniform_brightness/2;
int led6_brightness = uniform_brightness/2;

//'on' time in msec
unsigned long uniform_stim_time = 1000; /

//individual 'on' time settings for LED columns
unsigned long led1_stim_time = uniform_stim_time;
unsigned long led2_stim_time = uniform_stim_time;
unsigned long led3_stim_time = uniform_stim_time;
unsigned long led4_stim_time = uniform_stim_time;
unsigned long led5_stim_time = uniform_stim_time;
unsigned long led6_stim_time = uniform_stim_time;

//'off' time in msec
unsigned long uniform_off_time = 14000;

//individual 'off' time settings for LED columns
unsigned long led1_off_time = uniform_off_time;
unsigned long led2_off_time = uniform_off_time;
unsigned long led3_off_time = uniform_off_time;
unsigned long led4_off_time = uniform_off_time;
unsigned long led5_off_time = uniform_off_time;
unsigned long led6_off_time = uniform_off_time;

unsigned long currentMillis = 0;

//initialize timing and state variables
unsigned long led1_last_change = 0;
unsigned long led2_last_change = 0;
unsigned long led3_last_change = 0;
unsigned long led4_last_change = 0;
unsigned long led5_last_change = 0;
unsigned long led6_last_change = 0;

int led1_state = HIGH;
int led2_state = HIGH;
int led3_state = HIGH;
int led4_state = HIGH;
int led5_state = HIGH;
int led6_state = HIGH;

unsigned long led1_timer = 0;
```

```
unsigned long led2_timer = 0;
unsigned long led3_timer = 0;
unsigned long led4_timer = 0;
unsigned long led5_timer = 0;
unsigned long led6_timer = 0;

void setup() {
  // setup PWM pins for output
  pinMode(led1_pin, OUTPUT);
  pinMode(led2_pin, OUTPUT);
  pinMode(led3_pin, OUTPUT);
  pinMode(led4_pin, OUTPUT);
  pinMode(led5_pin, OUTPUT);
  pinMode(led6_pin, OUTPUT);

  //LED starting state
  analogWrite(led1_pin, led1_brightness);
  analogWrite(led2_pin, led2_brightness);
  analogWrite(led3_pin, led3_brightness);
  analogWrite(led4_pin, led4_brightness);
  analogWrite(led5_pin, led5_brightness);
  analogWrite(led6_pin, led6_brightness);
}

void loop() {
  currentMillis = millis();

  //identical timing loops for the 6 PWM output pins
  led1_timer = currentMillis - led1_last_change;
  if (led1_state == HIGH){ //led state is on
    if (led1_timer >= led1_stim_time){ //TRUE if stim time is complete
      analogWrite(led1_pin, 0); //turn LED off
      led1_state = LOW; //change LED state variable
      led1_last_change = currentMillis; //mark time of most recent change
    }
  }
  else{ //led1 state is off
    if (led1_timer >= led1_off_time){ //TRUE if off time is complete
      analogWrite(led1_pin, led1_brightness); //turn LED on
      led1_state = HIGH; //change LED state variable
      led1_last_change = currentMillis; //mark time of most recent change
    }
  }

  led2_timer = currentMillis - led2_last_change;
  if (led2_state == HIGH){
    if (led2_timer >= led2_stim_time){
      analogWrite(led2_pin, 0);
      led2_state = LOW;
      led2_last_change = currentMillis;
    }
  }
  else{ //led2 state is off
    if (led2_timer >= led2_off_time){
      analogWrite(led2_pin, led2_brightness);
      led2_state = HIGH;
      led2_last_change = currentMillis;
    }
  }

  led3_timer = currentMillis - led3_last_change;
  if (led3_state == HIGH){
    if (led3_timer >= led3_stim_time){
      analogWrite(led3_pin, 0);
      led3_state = LOW;
      led3_last_change = currentMillis;
    }
  }
  else{ //led3 state is off
    if (led3_timer >= led3_off_time){
      analogWrite(led3_pin, led3_brightness);
      led3_state = HIGH;
    }
  }
}
```

```
        led3_last_change = currentMillis;
    }
}

led4_timer = currentMillis - led4_last_change;
if (led4_state == HIGH){
    if (led4_timer >= led4_stim_time){
        analogWrite(led4_pin, 0);
        led4_state = LOW;
        led4_last_change = currentMillis;
    }
}
else{ //led4 state is off
    if (led4_timer >= led4_off_time){
        analogWrite(led4_pin, led4_brightness);
        led4_state = HIGH;
        led4_last_change = currentMillis;
    }
}

led5_timer = currentMillis - led5_last_change;
if (led5_state == HIGH){
    if (led5_timer >= led5_stim_time){
        analogWrite(led5_pin, 0);
        led5_state = LOW;
        led5_last_change = currentMillis;
    }
}
else{ //led5 state is off
    if (led5_timer >= led5_off_time){
        analogWrite(led5_pin, led5_brightness);
        led5_state = HIGH;
        led5_last_change = currentMillis;
    }
}

led6_timer = currentMillis - led6_last_change;
if (led6_state == HIGH){
    if (led6_timer >= led6_stim_time){
        analogWrite(led6_pin, 0);
        led6_state = LOW;
        led6_last_change = currentMillis;
    }
}
else{ //led6 state is off
    if (led6_timer >= led6_off_time){
        analogWrite(led6_pin, led6_brightness);
        led6_state = HIGH;
        led6_last_change = currentMillis;
    }
}
}
```

## Supplementary References

- 1 Banerjee, R. *et al.* The Signaling State of Arabidopsis Cryptochrome 2 Contains Flavin Semiquinone. *Journal of Biological Chemistry* 282, 14916-14922, doi:10.1074/jbc.M700616200 (2007).
- 2 Deisseroth, K. Optogenetics. *Nature methods* 8, 26-29, doi:10.1038/nmeth.f.324 (2011).
- 3 Zhang, F. *et al.* The microbial opsin family of optogenetic tools. *Cell* 147, 1446-1457, doi:10.1016/j.cell.2011.12.004 (2011).
- 4 Yizhar, O., Fenno, L. E., Davidson, T. J., Mogri, M. & Deisseroth, K. Optogenetics in neural systems. *Neuron* 71, 9-34, doi:10.1016/j.neuron.2011.06.004 (2011).
- 5 Airan, R. D., Thompson, K. R., Fenno, L. E., Bernstein, H. & Deisseroth, K. Temporally precise in vivo control of intracellular signalling. *Nature* 458, 1025-1029, doi:10.1038/nature07926 (2009).
- 6 Levskaya, A., Weiner, O. D., Lim, W. A. & Voigt, C. A. Spatiotemporal control of cell signalling using a light-switchable protein interaction. *Nature* 461, 997-1001, doi:10.1038/nature08446 (2009).
- 7 Yazawa, M., Sadaghiani, A. M., Hsueh, B. & Dolmetsch, R. E. Induction of protein-protein interactions in live cells using light. *Nat Biotechnol* 27, 941-945, doi:10.1038/nbt.1569 (2009).
- 8 Strickland, D. *et al.* TULIPs: tunable, light-controlled interacting protein tags for cell biology. *Nature methods* 9, 379-384, doi:10.1038/nmeth.1904 (2012).
- 9 Kennedy, M. J. *et al.* Rapid blue-light-mediated induction of protein interactions in living cells. *Nature methods* 7, 973-975, doi:10.1038/nmeth.1524 (2010).
- 10 Shimizu-Sato, S., Huq, E., Tepperman, J. M. & Quail, P. H. A light-switchable gene promoter system. *Nat Biotechnol* 20, 1041-1044, doi:10.1038/nbt734 (2002).
- 11 Ye, H., Daoud-El Baba, M., Peng, R. W. & Fussenegger, M. A synthetic optogenetic transcription device enhances blood-glucose homeostasis in mice. *Science* 332, 1565-1568, doi:10.1126/science.1203535 (2011).
- 12 Wang, X., Chen, X. & Yang, Y. Spatiotemporal control of gene expression by a light-switchable transgene system. *Nature methods* 9, 266-269, doi:10.1038/nmeth.1892 (2012).
- 13 Polstein, L. R. & Gersbach, C. A. Light-inducible spatiotemporal control of gene activation by customizable zinc finger transcription factors. *J Am Chem Soc* 134, 16480-16483, doi:10.1021/ja3065667 (2012).
- 14 Banerjee, R. *et al.* The signaling state of Arabidopsis cryptochrome 2 contains flavin semiquinone. *J Biol Chem* 282, 14916-14922, doi:10.1074/jbc.M700616200 (2007).
- 15 Witten, Ilana B. *et al.* Recombinase-Driver Rat Lines: Tools, Techniques, and Optogenetic Application to Dopamine-Mediated Reinforcement. *Neuron* 72, 721-733, doi:<http://dx.doi.org/10.1016/j.neuron.2011.10.028> (2011).
- 16 Grieger, J. C., Choi, V. W. & Samulski, R. J. Production and characterization of adeno-associated viral vectors. *Nat Protoc* 1, 1412-1428, doi:10.1038/nprot.2006.207 (2006).
- 17 Lock M, A. M., Vandenberghe LH, Samanta A, Toelen J, Debyser Z, Wilson JM. Rapid, Simple, and Versatile Manufacturing of Recombinant Adeno-Associated Viral Vectors at Scale. *Human Gene Therapy* 21, 1259-1271, doi:10.1089/hum.2010.055 (2010).
- 18 Nan, X. *et al.* Transcriptional repression by the methyl-CpG-binding protein MeCP2 involves a histone deacetylase complex. *Nature* 393, 386-389 (1998).



- 19 Boeke, J., Ammerpohl, O., Kegel, S., Moehren, U. & Renkawitz, R. The minimal repression domain of MBD2b overlaps with the methyl-CpG-binding domain and binds directly to Sin3A. *Journal of Biological Chemistry* 275, 34963-34967 (2000).
- 20 Laherty, C. D. *et al.* Histone deacetylases associated with the mSin3 corepressor mediate mad transcriptional repression. *Cell* 89, 349-356 (1997).
- 21 Zhang, J., Kalkum, M., Chait, B. T. & Roeder, R. G. The N-CoR-HDAC3 nuclear receptor corepressor complex inhibits the JNK pathway through the integral subunit GPS2. *Molecular cell* 9, 611-623 (2002).
- 22 Lauberth, S. M. & Rauchman, M. A conserved 12-amino acid motif in Sall1 recruits the nucleosome remodeling and deacetylase corepressor complex. *Journal of Biological Chemistry* 281, 23922-23931 (2006).
- 23 Gu, H. & Roizman, B. Herpes simplex virus-infected cell protein 0 blocks the silencing of viral DNA by dissociating histone deacetylases from the CoREST, ÆiREST complex. *Proceedings of the National Academy of Sciences* 104, 17134-17139 (2007).
- 24 Ouyang, J., Shi, Y., Valin, A., Xuan, Y. & Gill, G. Direct binding of CoREST1 to SUMO-2/3 contributes to gene-specific repression by the LSD1/CoREST1/HDAC complex. *Molecular cell* 34, 145-154 (2009).
- 25 Vannier, D., Balderes, D. & Shore, D. Evidence that the transcriptional regulators SIN3 and RPD3, and a novel gene (SDS3) with similar functions, are involved in transcriptional silencing in *S. cerevisiae*. *Genetics* 144, 1343-1353 (1996).
- 26 Gregoret, I., Lee, Y.-M. & Goodson, H. V. Molecular evolution of the histone deacetylase family: functional implications of phylogenetic analysis. *Journal of molecular biology* 338, 17-31 (2004).
- 27 Gao, L., Cueto, M. A., Asselbergs, F. & Atadja, P. Cloning and functional characterization of HDAC11, a novel member of the human histone deacetylase family. *Journal of Biological Chemistry* 277, 25748-25755 (2002).
- 28 Wu, K., Tian, L., Malik, K., Brown, D. & Miki, B. Functional analysis of HD2 histone deacetylase homologues in *Arabidopsis thaliana*. *The Plant Journal* 22, 19-27 (2000).
- 29 Scher, M. B., Vaquero, A. & Reinberg, D. SirT3 is a nuclear NAD<sup>+</sup>-dependent histone deacetylase that translocates to the mitochondria upon cellular stress. *Genes & development* 21, 920-928 (2007).
- 30 Hnisz, D., Schwarzmüller, T. & Kuchler, K. Transcriptional loops meet chromatin: a dual, Ælayer network controls white, Æopaque switching in *Candida albicans*. *Molecular microbiology* 74, 1-15 (2009).
- 31 Landry, J. *et al.* The silencing protein SIR2 and its homologs are NAD-dependent protein deacetylases. *Proceedings of the National Academy of Sciences* 97, 5807-5811 (2000).
- 32 Wilson, J. M., Le, V. Q., Zimmerman, C., Marmorstein, R. & Pillus, L. Nuclear export modulates the cytoplasmic Sir2 homologue Hst2. *EMBO reports* 7, 1247-1251 (2006).
- 33 Gertz, M. & Steegborn, C. Function and regulation of the mitochondrial Sirtuin isoform Sirt5 in Mammalia. *Biochimica et Biophysica Acta (BBA)-Proteins and Proteomics* 1804, 1658-1665 (2010).
- 34 Zhu, A. Y. *et al.* Plasmodium falciparum Sir2A preferentially hydrolyzes medium and long chain fatty acyl lysine. *ACS chemical biology* 7, 155-159 (2011).
- 35 Tennen, R. I., Berber, E. & Chua, K. F. Functional dissection of SIRT6: identification of domains that regulate histone deacetylase activity and chromatin localization. *Mechanisms of ageing and development* 131, 185-192 (2010).

- 36 Pennini, M. E., Perrinet, S. p., Dautry-Varsat, A. & Subtil, A. Histone methylation by NUE, a novel nuclear effector of the intracellular pathogen *Chlamydia trachomatis*. *PLoS pathogens* 6, e1000995 (2010).
- 37 Mujtaba, S. *et al.* Epigenetic transcriptional repression of cellular genes by a viral SET protein. *Nature cell biology* 10, 1114-1122 (2008).
- 38 Tachibana, M., Matsumura, Y., Fukuda, M., Kimura, H. & Shinkai, Y. G9a/GLP complexes independently mediate H3K9 and DNA methylation to silence transcription. *The EMBO journal* 27, 2681-2690 (2008).
- 39 Snowden, A. W., Gregory, P. D., Case, C. C. & Pabo, C. O. Gene-specific targeting of H3K9 methylation is sufficient for initiating repression in vivo. *Current biology* 12, 2159-2166 (2002).
- 40 Rathert, P., Zhang, X., Freund, C., Cheng, X. & Jeltsch, A. Analysis of the substrate specificity of the Dim-5 histone lysine methyltransferase using peptide arrays. *Chemistry & biology* 15, 5-11 (2008).
- 41 Jackson, J. P. *et al.* Dimethylation of histone H3 lysine 9 is a critical mark for DNA methylation and gene silencing in *Arabidopsis thaliana*. *Chromosoma* 112, 308-315 (2004).
- 42 Thorstensen, T. *et al.* The *Arabidopsis* SUV4 protein is a nucleolar histone methyltransferase with preference for monomethylated H3K9. *Nucleic acids research* 34, 5461-5470 (2006).
- 43 Vielle, A. *et al.* H4K20me1 Contributes to Downregulation of X-Linked Genes for *C. elegans* Dosage Compensation. *PLoS Genetics* 8, e1002933 (2012).
- 44 Couture, J.-F., Collazo, E., Brunzelle, J. S. & Trievel, R. C. Structural and functional analysis of SET8, a histone H4 Lys-20 methyltransferase. *Genes & development* 19, 1455-1465 (2005).
- 45 Sautel, C. I. F. *et al.* SET8-mediated methylations of histone H4 lysine 20 mark silent heterochromatic domains in apicomplexan genomes. *Molecular and cellular biology* 27, 5711-5724 (2007).
- 46 Hathaway, N. A. *et al.* Dynamics and memory of heterochromatin in living cells. *Cell* (2012).
- 47 Ballaré, C. *et al.* Phf19 links methylated Lys36 of histone H3 to regulation of Polycomb activity. *Nature structural & molecular biology* 19, 1257-1265 (2012).
- 48 Jin, Q. *et al.* The protein phosphatase-1 (PP1) regulator, nuclear inhibitor of PP1 (NIPP1), interacts with the polycomb group protein, embryonic ectoderm development (EED), and functions as a transcriptional repressor. *Journal of Biological Chemistry* 278, 30677-30685 (2003).
- 49 Cervoni, N., Detich, N., Seo, S.-B., Chakravarti, D. & Szyf, M. The oncoprotein Set/TAF-1 $\leq$ , an inhibitor of histone acetyltransferase, inhibits active demethylation of DNA, integrating DNA methylation and transcriptional silencing. *Journal of Biological Chemistry* 277, 25026-25031 (2002).
